1 **Germline loss-of-function *PAM* variants are enriched in subjects with pituitary**  
2 **hypersecretion**

3

4 Giampaolo Trivellin<sup>1,2\*</sup>, Adrian F. Daly<sup>3</sup>, Laura C. Hernández-Ramírez<sup>4,5</sup>, Elisa Araldi<sup>6</sup>,  
5 Christina Tatsi<sup>5</sup>, Ryan K. Dale<sup>7</sup>, Gus Fridell<sup>7</sup>, Arjun Mittal<sup>7</sup>, Fabio R. Faucz<sup>5,8</sup>, James R.  
6 Iben<sup>8</sup>, Tianwei Li<sup>8</sup>, Eleonora Vitali<sup>2</sup>, Stanko S. Stojilkovic<sup>9</sup>, Peter Kamenicky<sup>10</sup>, Chiara  
7 Villa<sup>11,12</sup>, Bertrand Baussart<sup>12,13</sup>, Prashant Chittiboia<sup>14</sup>, Camilo Toro<sup>15</sup>, William A. Gahl<sup>15</sup>,  
8 Erica A. Eugster<sup>16</sup>, Luciana A. Naves<sup>17</sup>, Marie-Lise Jaffrain-Rea<sup>18,19</sup>, Wouter W. de Herder<sup>20</sup>,  
9 Sebastian JCMM Neggers<sup>20</sup>, Patrick Petrossians<sup>3</sup>, Albert Beckers<sup>3</sup>, Andrea G. Lania<sup>1,2</sup>,  
10 Richard E. Mains<sup>21</sup>, Betty A. Eipper<sup>22</sup>, Constantine A. Stratakis<sup>5,23,24</sup>

11

12 <sup>1</sup>Department of Biomedical Sciences, Humanitas University, Via Rita Levi Montalcini 4,  
13 20072 Pieve Emanuele – Milan, Italy

14 <sup>2</sup>IRCCS Humanitas Research Hospital, Via Manzoni 56, 20089 Rozzano – Milan, Italy

15 <sup>3</sup>Department of Endocrinology, Centre Hospitalier Universitaire de Liège, University of Liège,  
16 Domaine Universitaire du Sart-Tilman, 4000 Liège, Belgium

17 <sup>4</sup>Red de Apoyo a la Investigación, Coordinación de la Investigación Científica, Universidad  
18 Nacional Autónoma de México e Instituto Nacional de Ciencias Médicas y Nutrición  
19 *Salvador Zubirán*. Tlalpan, CDMX 14080, Mexico

20 <sup>5</sup>Section on Endocrinology and Genetics, *Eunice Kennedy Shriver* National Institute of Child  
21 Health and Human Development (NICHD), National Institutes of Health (NIH), Bethesda, MD  
22 20892, USA

23 <sup>6</sup>Energy Metabolism Laboratory, Institute of Translational Medicine, Department of Health  
24 Sciences and Technology, Swiss Federal Institute of Technology (ETH) Zurich,  
25 Schwerzenbach, CH-8603, Switzerland

26 <sup>7</sup>Bioinformatics and Scientific Programming Core, *Eunice Kennedy Shriver* National Institute  
27 of Child Health and Human Development (NICHD), National Institutes of Health (NIH),  
28 Bethesda, MD 20892, USA

29 <sup>8</sup>Molecular Genomics Core, *Eunice Kennedy Shriver* National Institute of Child Health and  
30 Human Development (NICHD), National Institutes of Health (NIH), Bethesda, MD, 20892,  
31 USA

32 <sup>9</sup>Section on Cellular Signaling, *Eunice Kennedy Shriver* National Institute of Child Health and  
33 Human Development (NICHD), National Institutes of Health (NIH), Bethesda, MD 20892,  
34 USA

35 <sup>10</sup>Université Paris-Saclay, INSERM, Physiologie et Physiopathologie Endocriniennes, 94270  
36 Le Kremlin-Bicêtre, France

37 <sup>11</sup>Département de Neuropathologie de la Pitié Salpêtrière, Hôpital de la Pitié-Salpêtrière -  
38 APHP Sorbonne Université, 47-83 Bd de l'Hôpital 75651, Paris, France

39 <sup>12</sup>INSERM U1016, CNRS UMR 8104, Institut Cochin, 75014 Paris, France

40 <sup>13</sup>Service de Neurochirurgie, Hôpital Pitié-Salpêtrière, AP-HP Sorbonne, 47-83 Boulevard de  
41 l'Hôpital, 75651 Paris, France

42 <sup>14</sup>Neurosurgery Unit for Pituitary and Inheritable Diseases and Surgical Neurology Branch,  
43 National Institute of Neurological Disorders and Stroke (NINDS), National Institutes of Health  
44 (NIH), Bethesda, MD 20892, USA

45 <sup>15</sup>NIH Undiagnosed Diseases Program, Office of the Clinical Director, National Human  
46 Genome Research Institute (NHGRI), National Institutes of Health (NIH), Bethesda, MD  
47 20892, USA

48 <sup>16</sup>Division of Endocrinology & Diabetes, Department of Pediatrics, Riley Hospital for Children  
49 at IU Health, Indiana University School of Medicine, Indianapolis, IN 46202, USA

50 <sup>17</sup>Service of Endocrinology, University Hospital, Faculty of Medicine, University of Brasilia,  
51 70910900 Brasilia, Brazil

52 <sup>18</sup>Department of Biotechnological and Applied Clinical Sciences, University of L'Aquila,  
53 67100 L'Aquila, Italy

54 <sup>19</sup>Neuromed Institute, Istituto di Ricovero e Cura a Carattere Scientifico, 86077 Pozzilli, Italy

55 <sup>20</sup>Department of Medicine, Section Endocrinology, Pituitary Center Rotterdam, Erasmus  
56 University Medical Center, 3000 CA Rotterdam, the Netherlands

57 <sup>21</sup>Department of Neuroscience, UConn Health, 263 Farmington Avenue, Farmington, CT

58 06030, USA

59 <sup>22</sup>Department of Molecular Biology and Biophysics, UConn Health, 263 Farmington Avenue,

60 Farmington, CT 06030, USA

61 <sup>23</sup>Human Genetics & Precision Medicine, IMBB, Foundation for Research & Technology

62 Hellas, 70013 Heraklion, Crete, Greece

63 <sup>24</sup>Research Institute, ELPEN, Pikermi, 19009 Athens, Greece

64

### 65 **Author contributions**

66 GT and CAS conceived the study. GT, LCHR, AFD, RKD, GF, AM, BAE, REM, EA, and

67 CAS formulated study hypotheses and conceived and designed the experiments. GT,

68 LCHR, GF, AM, JRI, TL, CT (Camilo Toro), EA, FRF, CT, BAE, and REM performed the

69 experiments. GT, LCHR, AFD, GF, EA, FRF, CT (Camilo Toro), CT (Christina Tatsi), BAE,

70 and REM analyzed the data. GT, AFD, EA, BAE, and REM constructed the figures. GT

71 wrote the original manuscript draft. All authors reviewed and edited the manuscript.

72

### 73 **\*Corresponding author and person to whom reprints should be addressed:**

74 Dr. Giampaolo Trivellin, PhD

75 Department of Biomedical Sciences

76 Humanitas University

77 Via Rita Levi Montalcini 4

78 20072 Pieve Emanuele – Milan, Italy

79 E-mail: [giampaolo.trivellin@hunimed.eu](mailto:giampaolo.trivellin@hunimed.eu)

80

81 Manuscript type: Original article

82 Short title: Pituitary hypersecretion is associated to *PAM* variants

83 Keywords: peptidylglycine  $\alpha$ -amidating monooxygenase, amidation, gigantism, acromegaly,

84 Cushing disease, pituitary tumors

85 Abstract word count: 249

86 Main text word count: 10335

87 Figure number: 8

88 Table number: 3

89 References: 80

90

91 **Abstract**

92 Pituitary adenomas (PAs) are common, usually benign tumors of the anterior pituitary gland  
93 which, for the most part, have no known genetic cause. PAs are associated with major  
94 clinical effects due to hormonal dysregulation and tumoral impingement on vital brain  
95 structures. Following the identification of a loss-of-function variant (p.Arg703Gln) in the *PAM*  
96 gene in a family with pituitary gigantism, we investigated 299 individuals with sporadic PAs  
97 and 17 familial isolated pituitary adenomas kindreds for *PAM* variants. *PAM* encodes a  
98 multifunctional protein responsible for the essential C-terminal amidation of secreted  
99 peptides.

100 Genetic screening was performed by germline and tumor sequencing and germline copy  
101 number variation (CNV) analysis. No germline CNVs or somatic single nucleotide variants  
102 (SNVs) were identified. We detected seven likely pathogenic heterozygous missense,  
103 truncating, and regulatory SNVs. These SNVs were found in sporadic subjects with GH  
104 excess (p.Gly552Arg and p.Phe759Ser), pediatric Cushing disease (c.-133T>C and  
105 p.His778fs), or with different types of PAs (c.-361G>A, p.Ser539Trp, and p.Asp563Gly). The  
106 SNVs were functionally tested *in vitro* for protein expression and trafficking by Western  
107 blotting, for splicing by minigene assays, and for amidation activity in cell lysates and serum  
108 samples. These analyses confirmed a deleterious effect on protein expression and/or  
109 function. By interrogating 200,000 exomes from the UK Biobank, we confirmed a significant  
110 association of the *PAM* gene and rare *PAM* SNVs to diagnoses linked to pituitary gland  
111 hyperfunction.

112 Identification of *PAM* as a candidate gene associated with pituitary hypersecretion opens the  
113 possibility of developing novel therapeutics based on altering *PAM* function.

114

## 115 **Introduction**

116 The anterior pituitary gland plays a critical role in the dynamic control of major hormonal  
117 systems, including growth, fertility, and stress responses. Anterior pituitary adenomas (PAs),  
118 also called pituitary neuroendocrine tumors (PitNETs) [1], can be comprised of any of the  
119 secretory cell subtypes, such as lactotropes that secrete prolactin, somatotropes (growth  
120 hormone (GH)), corticotropes (adrenocorticotrophic hormone (ACTH)), gonadotropes (follicle  
121 stimulating hormone (FSH) and luteinizing hormone (LH)), and thyrotropes (thyroid  
122 stimulating hormone (TSH)) [2]. Although they are usually benign lesions, PAs can have a  
123 major impact through hormonal dysregulation and direct mass effects or invasion of brain  
124 structures (optic chiasm, cavernous sinus). Epidemiologically, PAs are one of the most  
125 frequent intracranial tumor types, and lead to clinically apparent disease with a frequency of  
126 approximately 1 per 1,000 in the general population [3, 4]. Approximately 95% of PAs occur  
127 sporadically. Hereditary PAs are often distinguished by a more severe clinical presentation,  
128 such as an earlier age at onset, aggressive growth, larger size, and greater resistance to  
129 treatment, and they might coexist with other syndromic components. Therefore, identification  
130 of germline genetic causes can have implications for earlier identification and treatment of  
131 affected individuals via genetic and clinical screening [5].

132

133 Germline changes like single nucleotide variants (SNVs) and/or copy number variants  
134 (CNVs) in several genes have been implicated in familial isolated pituitary adenomas - FIPA  
135 (*AIP* and *GPR101* genes) [6, 7], familial syndromic pituitary adenomas (*MEN1*, *CDKN1B*,  
136 *PRKAR1A*, *PRKACB*, *SDHx*, *MAX*, *NF1*, *DICER1*, *TSC2*, among others) and sporadic PAs  
137 (*AIP*, *GPR101*, *CABLES1*). Recurrent somatic SNVs are found most frequently in *GNAS* and  
138 *USP8*, in sporadic GH and ACTH-secreting PAs, respectively, and rarely in other genes [8].  
139 Despite these advances in establishing gene-disease links, the etiology of the overwhelming  
140 majority of inherited and sporadic pituitary adenomas remains unknown. Hence,  
141 identification and characterization of novel pathological genetic and genomic variants in PA  
142 cohorts is medically significant.

143

144 In a large, international cohort of individuals with PAs, we identified germline loss-of-function  
145 (LOF) variants of *PAM* (peptidylglycine  $\alpha$ -amidating monooxygenase, MIM: 170270) in  
146 subjects with familial and sporadic GH and ACTH hypersecretion. *PAM* is a highly  
147 conserved, multifunctional protein that is increasingly recognized as an important regulator  
148 of peptide amidation and secretion, among many other functions, in health and disease [9].  
149 We functionally evaluated 36 SNVs, demonstrating a deleterious effect on *PAM*  
150 function/expression in eight variants. We also report a statistically significant association of  
151 rare *PAM* SNVs with diagnoses of hyperfunction or tumors of the anterior pituitary gland.  
152 These results suggest that pathogenic *PAM* variants can predispose and/or contribute to the  
153 development of pathological pituitary hypersecretion.

154

155 **Results**

156 Identification of a pathogenic SNV in the *PAM* gene in a family with pituitary gigantism

157 The discovery cohort consisted of a three-member, non-consanguineous FIPA family that  
158 was enrolled in the UDP of the NIHCC. The kindred consisted of monozygotic twin brothers  
159 (individuals II-2 and II-3) and the eldest child of individual II-2, all of whom were affected by  
160 childhood-onset pituitary gigantism (Table 1 and Figure 1A).



161 **Table 1. Summary of characteristics of seven cases with rare pathogenic *PAM* variants**

| ID         | Diagnosis              | Gender | Pathogenic <i>PAM</i> variant(s)                    | Ethnicity        | Age at disease onset (years) | Age at PA diagnosis (years) | Tumor size (mm) | Treatment     | Other clinical diagnoses                                                                           |
|------------|------------------------|--------|-----------------------------------------------------|------------------|------------------------------|-----------------------------|-----------------|---------------|----------------------------------------------------------------------------------------------------|
| II-2*      | GH excess (gigantism)  | M      | c.2108G>A (p.Arg703Gln)                             | Caucasian        | <10                          | 35-40                       | 4               | PegV          | hypogonadism, adrenal nodules, pleural masses, severe osteopenia, muscular atrophy, diverticulosis |
| II-3*      | GH excess (gigantism)  | M      | c.2108G>A (p.Arg703Gln)                             | Caucasian        | <10                          | 35-40                       | 5x6             | TSS, SSA, PV  | hypogonadism, pancreatic and colon adenocarcinoma                                                  |
| III-3*     | GH excess (gigantism)  | M      | c.2108G>A (p.Arg703Gln)                             | Caucasian        | 1-5                          | 1-5                         | n.a.            | SSA, PegV     | hypotonia                                                                                          |
| NIH26      | pediatric CD           | F      | c.2332-2A>T (p.His778fs)                            | Caucasian        | 10-15                        | 10-15                       | 3               | TSS           | scleroderma                                                                                        |
| NIH36      | pediatric CD           | F      | c.-133T>C                                           | African-American | 10-15                        | 10-15                       | 10              | TSS (x3)      | no                                                                                                 |
| Belgium128 | GH excess (gigantism)  | M      | c.2276T>C (p.Phe759Ser)                             | Latino           | 15-20                        | 20's                        | Macro           | TSS, SRL      | none                                                                                               |
| Belgium197 | GH excess (acromegaly) | M      | c.1654G>A (p.Gly552Arg),<br>c.1688A>G (p.Asp563Gly) | Caucasian        | 40's                         | 40's                        | 40              | TSS, SRL, RTx | none                                                                                               |

162 F, female; M, male; n.a., not applicable; PA, pituitary adenoma; PegV, pegvisomant; RTx, radiotherapy; SRL, somatostatin receptor ligand; TSS, transsphenoidal surgery.

163 \*Member of the index FIPA kindred.

165 The monozygotic twins were born at 31 weeks gestation; their birth weights and lengths  
166 were 1.96 kg and 48.3 cm (II-2) and 2.3 kg and 53.3 cm (II-3), respectively. They had two  
167 normally sized siblings. Their father was 190 cm in height. Their mother was very tall [187  
168 cm; +4.1 SDS using Centers for Disease Control (CDC) charts] but had no known history of  
169 pituitary disease or established medical diagnosis of overgrowth; she died of colorectal  
170 cancer in her 70's. The precise onset of the twins' excessive growth is uncertain, but it  
171 began during childhood, such that by in their 10's they both measured >200 cm in height  
172 (>+6.2 SDS). They were formally diagnosed with pituitary gigantism as adults (35-40 years),  
173 at which time their final height was 231 cm (+7.8 SDS). At diagnosis they had clinical signs  
174 of acromegaly including coarse facial features, frontal bossing, and enlarged extremities.  
175 Elevated random GH (26 and 23.1 ng/mL) and IGF-1 (603 and 1130 ng/mL) levels were  
176 noted, but prolactin levels were below normal levels. Only minor abnormalities were noted  
177 on 3 Tesla pituitary magnetic resonance imaging (MRI), with possible small pituitary  
178 microadenomas, 4 mm and 5 mm in maximum diameter (Figure 1B). Individual II-3  
179 underwent transsphenoidal surgery, but no somatotropinoma tissue was identified by  
180 histopathology. Both brothers required medical therapy with the GH-receptor antagonist,  
181 pegvisomant, to reduce excess IGF-1. Colorectal and pancreatic adenocarcinomas were  
182 diagnosed in patient II-3, and he subsequently died of the latter tumor in his 40's.

183 The third affected member was III-3, a male (son of II-2) who was born with normal length  
184 and weight but developed marked overgrowth by the age of 12 months (Figure 1C). His  
185 siblings are dizygotic twins with normal height. III-3 was diagnosed with GH and IGF-1  
186 excess (random GH 30 ng/mL and IGF-1 389 ng/mL) before five years of age. An MRI  
187 demonstrated a normal pituitary gland (Figure 1D). To control the excessive growth, the  
188 patient was started on the long-acting somatostatin receptor ligand lanreotide autogel at a  
189 dose of 90-120 mg/month sc. Despite this adult level dosing, the GH remained uncontrolled  
190 and the IGF-1 rose to 487 ng/mL. During the lanreotide autogel treatment period, the growth  
191 velocity remained accelerated, at 15.9-20 cm/year. Similar to II-2 and II-3, his condition  
192 markedly improved on switching to pegvisomant (10-15 mg/day sc): IGF-1 rapidly fell from

193 500 ng/mL to 232 ng/mL and growth velocity decreased to 3.6-5.6 cm/year during  
194 approximately five years of follow-up. His growth curves for height and weight remain above  
195 the 99<sup>th</sup> centile but are no longer diverging (Figure 1E).

196

197 We conducted WES in peripheral blood-derived DNA isolated from the index cases (see the  
198 Methods section for details). We applied a variant prioritization strategy (Figure S1 and  
199 Table S3) and selected for further analysis a heterozygous missense SNV in *PAM*  
200 (c.2108G>A, p.Arg703Gln), which was shared by both twins from generation II (Figure 1A).  
201 DNA of their deceased mother was unavailable, so we could not confirm whether they  
202 inherited the *PAM* variant from her or if it arose *de novo*; the father was WT. The  
203 p.Arg703Gln variant was present in the other individual with gigantism, III-3, but also in III-1,  
204 his younger brother (Figure 1A). Endocrine and growth studies showed that III-1 had no  
205 evidence of growth excess or hormonal dysregulation at the time of study (age < 10 years).  
206 All other family members studied were WT for *PAM* and had normal growth. Overall, these  
207 results suggest incomplete penetrance. No other potentially pathogenic alterations in genes  
208 were shared among the three affected members.

209

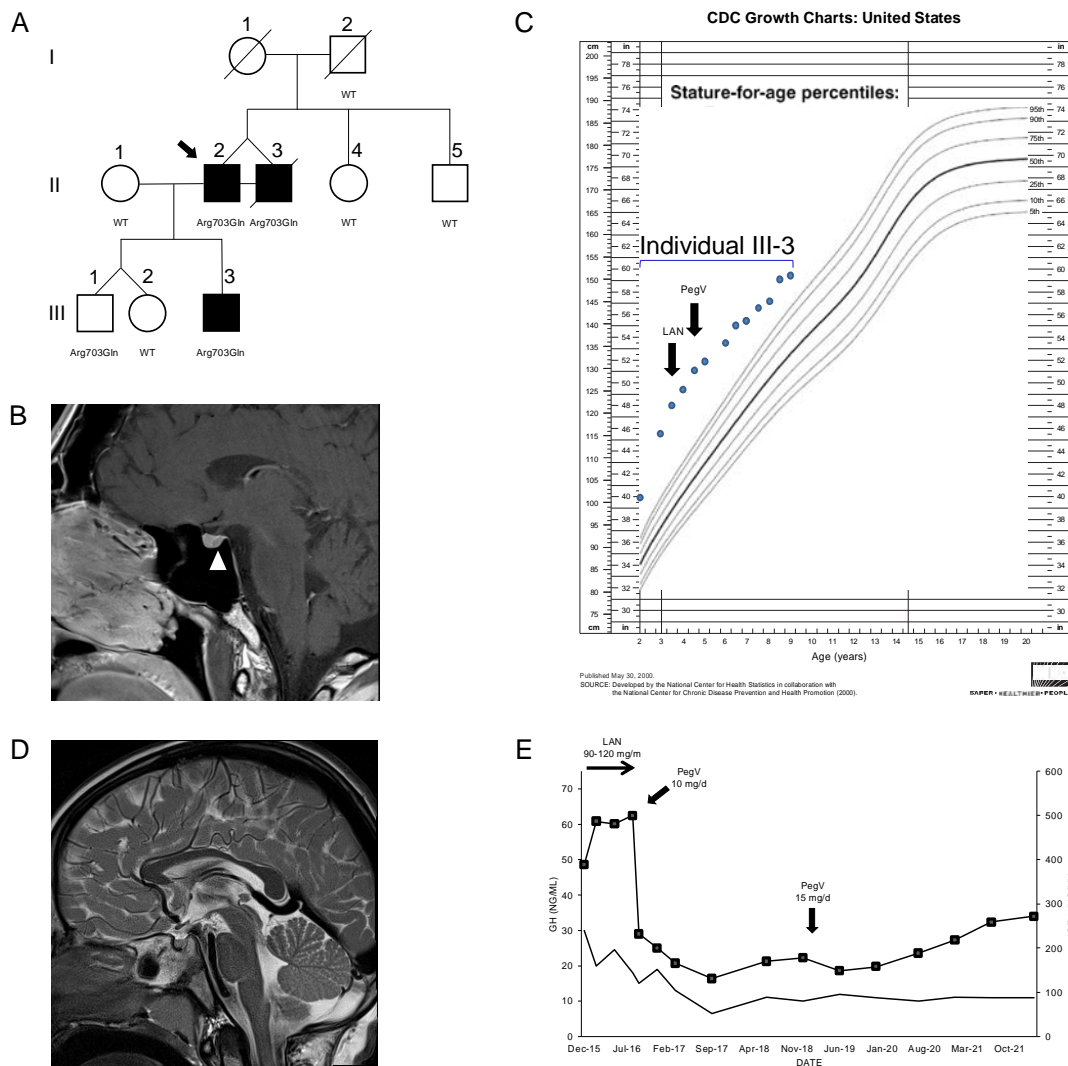

210

211 **Figure 1. Clinical findings in the index family with pituitary gigantism**

212 (A) Pedigree. Generation numbers are represented by Roman numerals, and individual numbers are  
 213 in Arabic numerals. The proband is II-2, indicated by the black arrow. Open square/circle, unaffected  
 214 male/female; filled square, affected male. *PAM* mutational status is shown under each screened  
 215 individual. In (B) the white arrowhead points to a possible 4 mm lesion, seen in II-2. (C) Growth chart  
 216 for individual III-3 before and after medical interventions. (D) A sagittal T2-weighted MRI of individual  
 217 III-3 that was performed before medical therapy began did not reveal a pituitary lesion. (E) Time  
 218 course of the effects of treatment modalities on GH (left axis) and IGF-1 (right axis) in individual III-3.  
 219 The rapid decrease of IGF-1 after switching from lanreotide (LAN) to pegvisomant (PegV) is evident.

220

221 The *PAM* variant was notable among the 27 candidates due to its strong expression in  
222 neuroendocrine tissues and gene function. As reported in *The Human Protein Atlas*, the  
223 pituitary is among the tissues displaying the strongest *PAM* mRNA and protein expression  
224 signal in human and other mammals. *PAM* is highly expressed in all pituitary cell types,  
225 including folliculostellate cells (Figure S2A), where it plays a crucial function in post-  
226 translational hormone processing and secretion [10, 11]. Staining for *PAM* and GM130, a  
227 cis-Golgi marker, in normal adult human pituitary cells showed diffuse cytoplasmic  
228 expression for *PAM* that partially overlapped the Golgi (Figure S2B), reflecting the  
229 established trafficking of *PAM* within the secretory pathway observed in rat pituitary cells.  
230 *PAM* is a multifunctional protein that contains two enzymatic domains, peptidylglycine  $\alpha$ -  
231 hydroxylating monooxygenase (PHM) and peptidyl- $\alpha$ -hydroxyglycine  $\alpha$ -amidating lyase  
232 (PAL); acting sequentially, the two domains generate C-terminally amidated peptides [10].  
233 The p.Arg703Gln variant – located in the PAL domain (Figure 2A) – has an extremely low  
234 minor allele frequency in controls (MAF: 0.0013%), no homozygous variant entries in  
235 gnomAD, and is bioinformatically predicted to be pathogenic (Table 2).

236 **Table 2. Prioritized heterozygous missense, truncating, and regulatory PAM variants that were functionally analyzed**

| DNA change    | Protein change | SNP ID       | Location in gene | Location in protein | MAF in our cohort (%) | Global Control MAF (%) | Highest Control Population MAF (%) | # of homozygotes in gnomAD | P-value | <i>In silico</i> prediction        | Individuals harboring the variant                         |
|---------------|----------------|--------------|------------------|---------------------|-----------------------|------------------------|------------------------------------|----------------------------|---------|------------------------------------|-----------------------------------------------------------|
| c.-607A>G †   | n.a.           | rs76396377   | promoter         | n.a.                | 0.4                   | 1.479                  | 2.943 (African)                    | 24                         | n.s.    | 1 TF replaced                      | 1 from 1 FIPA (PRL)                                       |
| c.-550G>T †   | n.a.           | rs1007572715 | promoter         | n.a.                | 0.4                   | 0.0072                 | 0.0415 (South Asian)               | 0                          | <0.05   | 2 TFs lost                         | 1 acro                                                    |
| c.-361G>A     | n.a.           | rs143617515  | 5'UTR (exon 1)   | n.a.                | 1.21                  | 0.6275                 | 3.647 (Finnish)                    | 12                         | n.s.    | 2 TFs lost, 4 TFs created          | 2 gigantism, 1 NFPA                                       |
| c.-133T>C *   | n.a.           | rs1413721196 | 5'UTR (exon 1)   | n.a.                | 0.25                  | 0.0007                 | 0.0015 (European)                  | 0                          | <0.05   | 1 TF lost                          | 1 pediatric CD                                            |
| c.-109G>C     | n.a.           | Novel        | 5'UTR (exon 1)   | n.a.                | 0.25                  | n.a.                   | n.a.                               | n.a.                       | n.a.    | 1 TF replaced                      | 1 acro                                                    |
| c.-35C>G      | n.a.           | rs201016377  | 5'UTR (exon 1)   | n.a.                | 0.15                  | 0.0749                 | 0.9040 (Finnish)                   | 1 (Finnish)                | n.s.    | n.a.                               | 1 gigantism                                               |
| c.79G>A **    | p.Val27Ile     | rs199856250  | exon 1           | proregion           | 0.16                  | 0.0004                 | 0.0008 (European)                  | 0                          | <0.05   | VUS (1, 6, 12)                     | 1 acro                                                    |
| c.92T>A       | p.Phe31Tyr     | rs114014768  | exon 2           | linker region       | 0.63                  | 0.8654                 | 2.814 (African)                    | 19                         | n.s.    | likely benign (0, 1, 16)           | 2 acro, 1 gigantism, 1 pediatric CD                       |
| c.145G>C      | p.Val49Leu     | rs2230458    | exon 2           | PHMcc               | 0.94                  | 0.9278                 | 1.803 (Finnish)                    | 5 (European)               | n.s.    | likely benign (0, 2, 17)           | 2 gigantism, 3 pediatric CD, 1 PRL                        |
| c.239G>A      | p.Arg80Gln     | rs753307443  | exon 3           | PHMcc               | 0.16                  | 0.0026                 | 0.0066 (Latino)                    | 0                          | <0.05   | likely benign (1, 5, 13)           | 1 from 1 FIPA (GH excess)                                 |
| c.718C>T ††   | p.His240Tyr    | rs761898981  | exon 9           | PHMcc               | 0.15                  | 0.0039                 | 0.0478 (Other)                     | 0                          | <0.05   | VUS (0, 11, 7)                     | 1 gigantism                                               |
| c.731T>C **   | p.Val244Ala    | rs201009674  | exon 10          | PHMcc               | 0.16                  | 0.0533                 | 0.6632 (Ashkenazi Jewish)          | 0                          | n.s.    | likely pathogenic (6, 12, 0)       | 1 pediatric CD                                            |
| c.1235C>T **  | p.Pro412Leu    | rs761619241  | exon 14          | linker region       | 0.16                  | 0.0016                 | 0.0029 (Latino)                    | 0                          | <0.05   | likely pathogenic (6, 9, 4)        | 2 from 1 FIPA (heterogeneous)                             |
| c.1354A>G     | p.Ile452Val    | rs145710876  | exon 14          | linker region       | 0.16                  | 0.0151                 | 0.0555 (African)                   | 0                          | n.s.    | likely benign (0, 0, 18)           | 1 gigantism                                               |
| c.1473A>C     | p.Glu491Asp    | rs61736661   | exon 14          | linker region       | 0.16                  | 0.6662                 | 1.241 (European)                   | 8 (European)               | n.s.    | likely benign (0, 1, 16)           | 1 from 1 FIPA (PRL)                                       |
| c.1616C>G     | p.Ser539Trp    | rs78408340   | exon 16          | PALcc               | 0.15                  | 0.4169                 | 0.7250 (European)                  | 2 (European)               | n.s.    | likely pathogenic (10, 6, 2)       | 1 acro                                                    |
| c.1654G>A ††  | p.Gly552Arg    | rs201249509  | exon 16          | PALcc               | 0.15                  | 0.0053                 | 0.0103 (European)                  | 0                          | <0.05   | likely pathogenic (10, 6, 2)       | 1 acro                                                    |
| c.1688A>G     | p.Asp563Gly    | rs35658696   | exon 16          | PALcc               | 4.00                  | 3.109                  | 5.657 (European)                   | 108                        | n.s.    | likely pathogenic (4, 11, 1)       | 13 acro, 5 gigantism, 4 PRL, 4 CD (3 pediatric, 1 silent) |
| c.1921G>C     | p.Gly641Arg    | rs775364358  | exon 18          | PALcc               | 0.15                  | 0.0033                 | 0.0197 (Latino)                    | 0                          | <0.05   | likely benign (0, 3, 16)           | 1 PRL                                                     |
| c.2108G>A     | p.Arg703Gln    | rs761130902  | exon 19          | PALcc               | 0.15                  | 0.0013                 | 0.0193 (East Asian)                | 0                          | <0.05   | likely pathogenic (10, 9, 0)       | 4 (3 affected) from 1 FIPA (gigantism)                    |
| c.2276T>C ††  | p.Phe759Ser    | rs375364507  | exon 20          | PALcc               | 0.15                  | 0.0092                 | 0.0206 (European)                  | 0                          | n.s.    | likely pathogenic (7, 11, 0)       | 1 gigantism                                               |
| c.2332-2A>T § | p.His778fs     | rs1006675725 | intron 20        | PALcc               | 0.15                  | 0.0007                 | 0.0015 (European)                  | 0                          | <0.05   | pathogenic (disrupts canonical SA) | 2 (1 pediatric CD and unaffected parent)                  |
| c.*1455C>T ¶¶ | n.a.           | rs146343559  | 3'UTR (exon 25)  | n.a.                | 0.67                  | 0.0362                 | 0.1047 (Latino)                    | 0                          | n.s.    | creates new miRNA binding sites    | 1 pediatric CD                                            |

237 Variants were annotated using the NC\_000005.9(NM\_000919.3) reference sequence. All variants were observed in heterozygosis. MAFs were retrieved from  
238 the gnomAD database ver. 3.1.2. “European” excludes the Finnish population; “African” includes African-American; “Latino” includes Admixed American. For  
239 *in silico* predictions, the computational verdict was based on the combined outputs of 19 softwares available in Varsome (within parentheses, the first number  
240 represents the pathogenic verdicts, the second number the uncertain verdicts, and the third number the benign verdicts) for all missense variants; for the  
241 truncating and 3’UTR variants we used Alamut predictions; for the regulatory variants we used Genomatix MatInspector. Individual variant allele frequencies  
242 in the study population were compared with the global frequencies reported in gnomAD using the Fisher’s exact test or the chi-square test, as appropriate.  
243 acro, acromegaly; CD, Cushing disease; FIPA, familial isolated pituitary adenoma; MAF, minor allele frequency; n.a., not available/applicable; NFPA, non-  
244 functioning pituitary adenoma; n.s., not significant; PALcc, catalytic core of peptidyl- $\alpha$ -hydroxyglycine  $\alpha$ -amidating lyase; PHMcc, catalytic core of  
245 peptidylglycine  $\alpha$ -hydroxylating monooxygenase; PRL, prolactinoma; SA, splice acceptor site; TF, transcription factor; VUS, variant of uncertain significance.  
246 †This individual harbors the PAM p.Glu491Asp variant in exon 14.  
247 ‡This individual harbors the PAM p.Val49Leu variant in exon 2.  
248 ¥This individual harbors the PAM p.Phe31Tyr variant in exon 2 and a somatic heterozygous p.Ser718del variant in the *USP8* gene [12].  
249 ††This individual is compound heterozygote for p.[His240Tyr];p.[Phe759Ser].  
250 ††This individual is compound heterozygote for p.[Gly552Arg];p.[AspD563Gly].  
251 ¥¥This individual harbors a somatic heterozygous p.Ser718Pro variant in the *USP8* gene [12].  
252 ¥¥¥This individual harbors a somatic heterozygous p.Ser718del variant in the *USP8* gene [12].  
253 §Somatic hotspot variants in the *USP8*, *BRAF*, and *USP48* genes were ruled out in this case.  
254 \*\*Allele frequency obtained from gnomAD ver. 2.1.1.

255 Arg703 is conserved throughout evolution (Figure 2B). Along with Tyr651, crystallographic  
256 studies identified Arg703 as part of the PALcc catalytic dyad; the catalytic activity of soluble  
257 recombinant rat PALcc, in which Arg703 was replaced by Ala or Gln, was greatly reduced  
258 [13], a result consistent with its location at the active site (Figure 2C). Altogether, these data  
259 suggested that a LOF *PAM* variant could be associated with pituitary gigantism, prompting  
260 us to pursue this lead.  
261



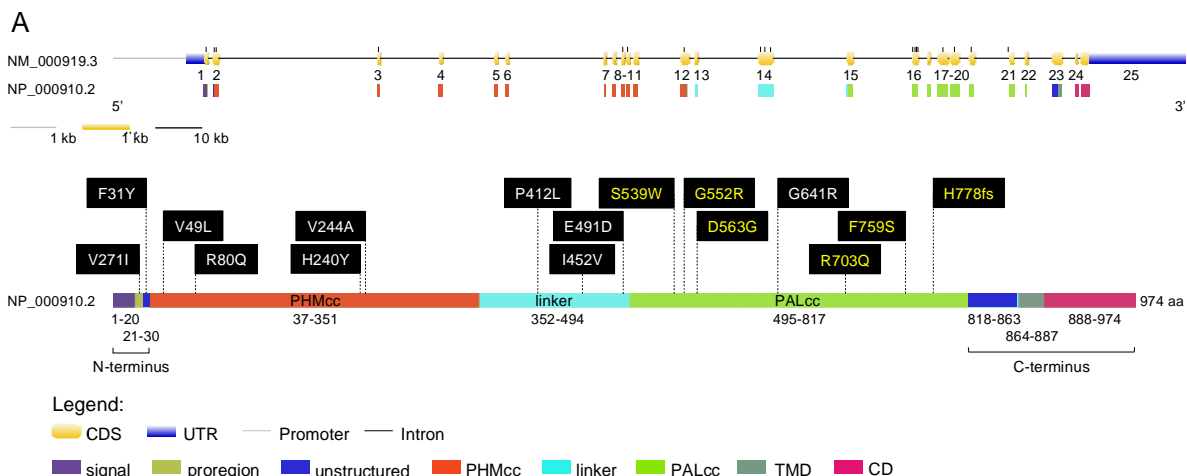

**B**

PAL: Ser539Trp (Ex15/16); **inactive**      PAL: Gly552Arg (Ex16); **6% active**      PAL: Asp563Gly (Ex16); **14% active**

|     | 536 |   | 539 |   | 542 |   | 549 |   | 552 |   | 555 |   | 560 |   | 563 |   | 566 |   |   |   |   |
|-----|-----|---|-----|---|-----|---|-----|---|-----|---|-----|---|-----|---|-----|---|-----|---|---|---|---|
| hum | D   | G | N   | S | F   | D | S   | I | G   | L | G   | P | I   | E | L   | V | I   | D | P | N | N |
| chi | D   | G | N   | S | F   | D | S   | I | G   | L | G   | P | I   | E | L   | V | I   | D | P | N | N |
| rat | D   | G | N   | S | F   | D | S   | R | G   | L | G   | P | I   | E | L   | V | I   | D | P | N | N |
| apl | N   | A | A   | S | F   | D | I   | F | Q   | D | S   | P | I   | T | L   | V | T   | D | S | T | G |
| dro | D   | V | N   | T | F   | N | E   | I | E   | Y | G   | P | I   | K | Y   | V | L   | D | A | K | T |
| chl | K   | S | D   | T | F   | D | R   | T | R   | K | E   | P | V   | P | L   | N | M   | N | P | D | T |

  

PAL: Arg703Gln (Ex19); **inactive**      PAL: Phe759Ser (Ex20); **12% active**

|     | 700 |   | 703 |   | 706 |   | 756 |   | 759 |   | 762 |   |   |   |
|-----|-----|---|-----|---|-----|---|-----|---|-----|---|-----|---|---|---|
| hum | V   | A | D   | R | E   | N | G   | V | Q   | G | F   | V | M | N |
| chi | V   | A | D   | R | E   | N | G   | V | Q   | G | F   | V | M | N |
| rat | V   | A | D   | R | E   | N | G   | V | Q   | G | F   | V | M | N |
| apl | V   | A | D   | R | E   | N | G   | V | Q   | G | F   | T | V | D |
| dro | I   | A | D   | R | E   | N | M   | V | R   | G | F   | T | I | D |
| chl | V   | A | S   | R | E   | G | R   | P | T   | Q | F   | W | T | L |

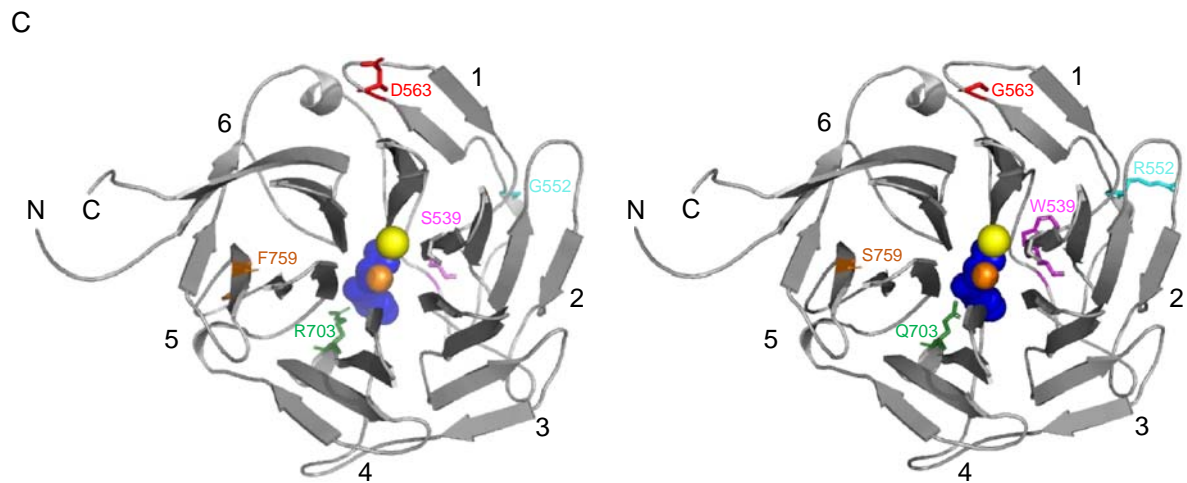

262

263

264 **Figure 2. Location and evolutionary conservation of the missense and frameshift *PAM* SNVs**  
265 **that were functionally tested**

266 (A) Schematic representation of the *PAM* gene (GenBank: NM\_000919.3, PAM-1, 25 exons) and  
267 encoded protein (NP\_000910.2, 974 amino acids), including functional domains, with 15 missense  
268 and a frameshift SNVs. Gene and protein structures were drawn with the Gene Structure Display  
269 Server (GSDS ver. 2.0) [14]. Variants found to have deleterious effects on PAM function/expression  
270 ( $p < 0.01$ ) are shown in yellow lettering, while those without major effects are shown in white  
271 lettering. Brackets identify the non-catalytic regions that precede PHMcc (N-Terminus) and follow  
272 PALcc (C-Terminus); CD, cytosolic domain; CDS, coding sequence; PALcc, catalytic core of peptidyl-  
273  $\alpha$ -hydroxyglycine  $\alpha$ -amidating lyase; PHMcc, catalytic core of peptidylglycine  $\alpha$ -hydroxylating  
274 monooxygenase; TMD, transmembrane domain; UTR, untranslated region. (B) Protein sequence  
275 alignments for five of the variants with deleterious effects. Conserved affected residues are shown in  
276 yellow. PAL activities, indicated in red, refer to functional experiments in PEAkrapid cells. (C) The  
277 crystal structure of rat PALcc (PDB entry 3FW0) was used to contextualize the missense variants  
278 categorized as likely pathogenic based on *in silico* analyses; the WT residue is shown on the left and  
279 the mutant residue on the right. PAL folds as a  $\beta$ -propeller, with six blades (numbered 1 to 6)  
280 positioned around a central cavity. The calcium and mercury ions are depicted as yellow and orange  
281 spheres, respectively. The mercury ion was used instead of zinc to capture the binding of a  
282 nonpeptide substrate,  $\alpha$ -hydroxyhippuric acid, depicted in blue. The affected residues are highlighted  
283 in purple (Ser or Trp 539), cyan (Gly or Arg 552), red (Asp or Gly 563), green (Arg or Gln 703), and  
284 orange (Phe or Ser 759), along the ribbon visualization of WT rat PALcc in grey. Arg703 is positioned  
285 at the active site and participates in substrate binding. Interestingly, p.Gly552Arg and p.Asp563Gly  
286 are located on the same face of the  $\beta$ -propeller. C, C-terminus; N, N-terminus.

287

288 *PAM* screening in a validation cohort revealed multiple likely pathogenic SNVs by *in silico*  
289 prediction

290 We next determined whether predicted pathogenic *PAM* variants are associated with other  
291 types of PAs, both hereditary and sporadic. To do so, we screened a diverse group of 326  
292 germline and 60 tumor DNAs from PA patients for *PAM* SNVs (see the Methods section and  
293 Table S1 for details). Sequencing covered the *PAM* CDS and exon–intron junctions.

294 Germline CNVs at the *PAM* locus were analyzed by ddPCR in a cohort of 137 individuals  
295 with PAs (16 with gigantism and 121 with different types of PAs). Germline DNA sequencing  
296 detected 51 SNVs (Table 2 and Table S4). There were no germline CNVs, or  
297 rare/pathogenic somatic DNA SNVs (data not shown). A subset of the germline SNVs (15 of  
298 51) was prioritized for further screening together with the p.Arg703Gln variant (Table 2). This  
299 selection was based on the following non-mutually exclusive criteria: MAF < 1%, *in silico*  
300 analysis with multiple algorithms predicting a deleterious effect on PAM function or splicing,  
301 and published functional data indicating pathogenicity [15]. To complement these data, we  
302 used Clustal and structure-based analyses to identify variants that could impact protein  
303 structure/function (Figure 2B and 2C, Figure S3). The remaining, non-characterized germline  
304 SNVs are listed in Table S4.

305

306 Four of the 16 heterozygous nonsynonymous and splice site-affecting SNVs prioritized for  
307 functional studies were in PHMcc and seven were in PALcc; the remainder were in the non-  
308 catalytic regions of PAM (Figure 2A). Based on *in silico* predictions, one of the four SNVs in  
309 PHMcc and six of the seven in PALcc were predicted to be pathogenic (Table 2). The  
310 prioritized variants were not significantly spatially clustered when we considered the  
311 geometric mean distance between all pairs of variants normalized to cDNA length ( $p = 0.35$ ).  
312 However, when we classified the variants based on their location within the N-terminus,  
313 PHMcc, linker, PALcc or C-terminus (Figure 2A), the N-terminus harbored more variants  
314 than expected by random chance ( $p = 0.02$ , Table S5).

315

316 Expression of prioritized *PAM* SNVs revealed deficits in protein expression, enzymatic  
317 activity, and glycosylation

318 To understand the impact of the prioritized *PAM* variants on the function of this membrane  
319 enzyme, we transiently expressed each PAM-1 variant in PEAkRapid (HEK-293 derivative)  
320 cells. To facilitate accurate assessment of the PHM and PAL activity of each *PAM* variant, a  
321 non-ionic detergent (TX-100) was used to solubilize membrane proteins from a crude

322 particulate fraction (Figure 3A). PAM expression levels and protein integrity were evaluated  
323 by Western blot analysis (Figure 3B) and PAM trafficking was assessed by analysis of N-  
324 and O-linked oligosaccharide maturation (Figure 3C and 3D).

325 To establish the efficacy of our expression system, we compared the properties of WT PAM  
326 to those of missense PAM variants designed to inactivate PHMcc (p.Thr189Ile) or PALcc  
327 (p.His529Arg and p.Gly796Glu, Figure S4). PHM and PAL activity measurements for WT  
328 PAM and for each engineered control were normalized to the expression of that PAM protein  
329 [(PHM or PAL activity)/PAM protein], providing a measure of its specific activity; the PHM  
330 and PAL specific activities of each engineered control were then compared to the PHM and  
331 PAL specific activities of WT PAM. As expected, the PHM activity of the p.Thr189Ile mutant  
332 and the PAL activity of the p.His529Arg and p.Gly796Glu mutants were reduced more than  
333 ten-fold compared to WT PAM (Figure S4 and Table 3).

334

335

336 **Table 3. Summary of effects on enzymatic activity and glycosylation for all PAM variants that**  
 337 **were functionally tested**

| PAM variant            | PHM activity (% WT) | PAL activity (% WT) | PNGaseF (N-sugars) | Neuraminidase (sialic acid) |
|------------------------|---------------------|---------------------|--------------------|-----------------------------|
| WT                     | 100 ± 2             | 100 ± 3             | yes                | yes                         |
| Val27Ile               | 79 ± 6              | 103 ± 15            | (yes)              | (yes)                       |
| Phe31Tyr               | 76 ± 16             | 84 ± 1              | (yes)              | (yes)                       |
| Val49Leu               | 80 ± 26             | 93 ± 1              | (yes)              | (yes)                       |
| Arg80Gln               | 75 ± 6              | 87 ± 9              | (yes)              | (yes)                       |
| Thr189Ile <sup>†</sup> | 6 ± 3**             | 23 ± 5**            | yes                | no                          |
| His240Tyr              | 111 ± 24            | 98 ± 22             | yes                | no                          |
| Val244Ala              | 113 ± 32            | 80 ± 10             | (yes)              | (yes)                       |
| Pro412Leu              | 81 ± 32             | 85 ± 28             | (yes)              | (yes)                       |
| Ile452Val              | 112 ± 45            | 113 ± 30            | (yes)              | (yes)                       |
| Glu491Asp              | 133 ± 75            | 138 ± 55            | (yes)              | (yes)                       |
| His529Arg <sup>†</sup> | 41 ± 13             | 7 ± 1**             | n.a.               | n.a.                        |
| Ser539Trp              | 49 ± 7**            | 0 ± 1**             | yes                | no                          |
| Gly552Arg              | 41 ± 6**            | 6 ± 2**             | yes                | no                          |
| Asp563Gly              | 44 ± 8**            | 14 ± 3**            | yes                | no                          |
| Gly641Arg              | 104 ± 0             | 116 ± 10            | (yes)              | (yes)                       |
| Arg703Gln              | 92 ± 17             | 0 ± 1**             | yes                | yes                         |
| Phe759Ser              | 110 ± 25            | 12 ± 3**            | yes                | no                          |
| His778fs               | 23 ± 3**            | 0 ± 1**             | n.a.               | n.a.                        |
| Gly796Glu <sup>†</sup> | 55 ± 8              | 4 ± 1**             | (yes)              | (yes)                       |

338 Values are presented as mean ± SEM.  
 339 n.a., not assessed; WT, wild-type; (yes), based on SDS-PAGE profile.  
 340 <sup>†</sup>Engineered inactive mutants.  
 341 \*\* p < 0.0001.  
 342

343

344 The structure of bifunctional PAM has not yet been experimentally determined, but for all  
345 three engineered variants, inactivating mutations placed into one domain resulted in a  
346 modest decrease in the activity of the other domain.

347 Activity and Western blot data for all studied SNVs are shown in Figure 3A and 3B,  
348 respectively. No significant decrease in PHM activity was seen for SNVs p.Val27Ile,  
349 p.Phe31Tyr, p.Val49Leu, p.Arg80Gln, p.His240Tyr or p.Val244Ala. The three non-catalytic  
350 linker domain SNVs tested exhibited no significant change in PHM or PAL activity and were  
351 not extensively assayed. Six of the seven SNVs located in PALcc exhibited a dramatic  
352 decrease in PAL activity. While some PALcc variants reduced PHM activity, others did not.  
353 Although the PAL activity of p.Arg703Gln was undetectable and the PAL activity of  
354 p.Phe759Ser was 12% of WT, their PHM activities were equal to that of WT. In contrast, the  
355 dramatic reductions in PAL activity observed for p.Ser539Trp, p.Gly552Arg, p.Asp563Gly,  
356 and p.His778fs were accompanied by at least a two-fold decrease in PHM activity. Normal  
357 levels of both PHM and PAL activity were detected for p.Gly641Arg.

358

359 Maturation of N-linked oligosaccharides is generally completed only when the newly  
360 synthesized protein exits the Golgi complex. Sialylation of both the N- and O-linked  
361 oligosaccharides attached to rat PAM-1 occurs just before it exits the Golgi complex. The  
362 stepwise manner in which the maturation of N- and O-linked glycans occurs often results in  
363 glycoprotein heterogeneity, contributing to the diffuse bands observed for WT PAM and  
364 many of the prioritized SNVs (Figure 3B, FLAG Ab and PHM Ab). In contrast, we  
365 consistently observed a slightly smaller, more compact band for p.Thr189Ile (engineered  
366 variant), p.His240Tyr, p.Ser539Trp, p.Gly552Arg, p.Asp563Gly, and p.Phe759Ser.

367

368 Since altered access to the enzymes responsible for the maturation of N- and O-linked  
369 glycans can reflect altered protein trafficking, we utilized PNGase F to remove N-linked  
370 oligosaccharides and neuraminidase to remove sialic acid (Figure 3D). The 2 to 3 kDa  
371 reduction in apparent molecular mass caused by PNGase F treatment demonstrated that the

372 engineered control lacking PHM activity (Thr189Ile) and that each of these six variants had  
373 been N-glycosylated. As expected, neuraminidase treatment brought about a slight  
374 decrease in the apparent molecular mass of WT PAM. Strikingly, neuraminidase treatment  
375 failed to reduce the mass of any of these six SNVs, indicating that their glycans had not  
376 undergone normal sialylation. Despite this, p.His240Tyr, one of the variants exhibiting  
377 altered sialylation, had normal levels of both PHM and PAL activity. Altered trafficking in the  
378 secretory and/or endocytic pathway could limit sialylation.

379

380 A summary of the effect of each prioritized and engineered SNV on PAM expression,  
381 enzymatic activity and oligosaccharide maturation is presented in Table 3.

382

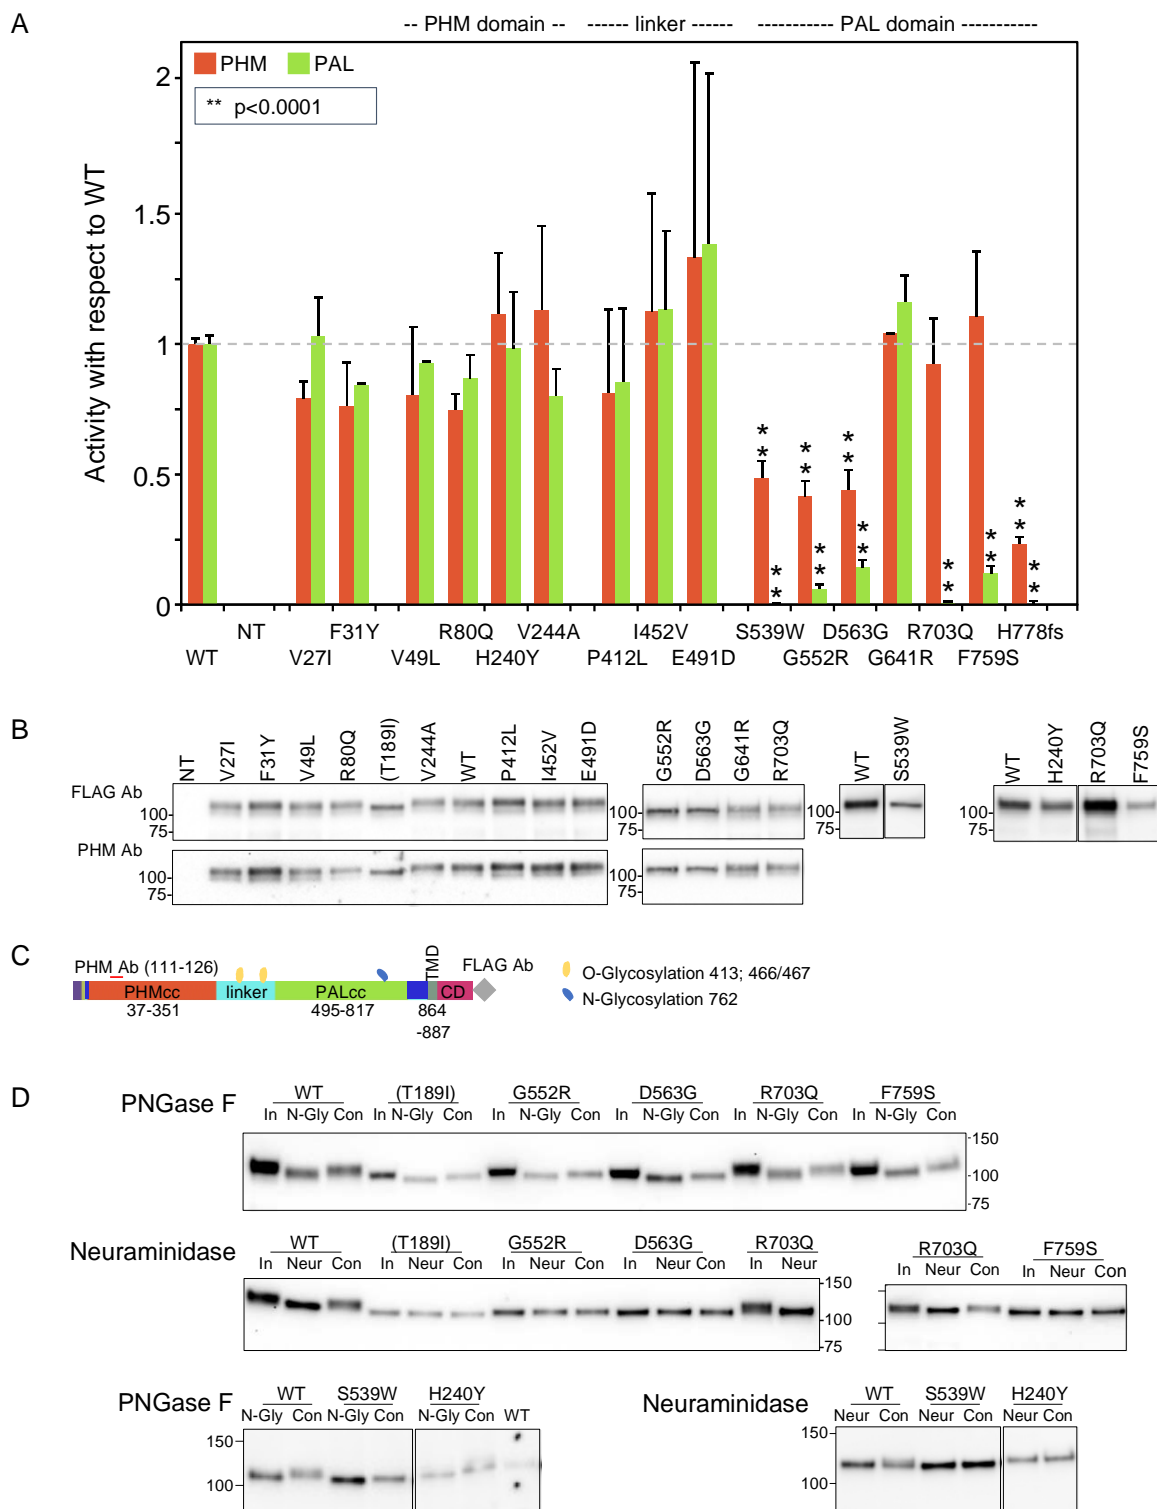

383

384 **Figure 3. Enzymatic activity, protein expression, and glycosylation pattern of PAM variants**

385 (A) PHM and PAL activity. As described in Methods, TMT solubilized particulate fractions prepared  
 386 from transiently transfected PEAKrapid cells were assayed for PHM activity and for PAL activity. Data



387 for the level of expression of WT PAM and each full-length variant were determined by quantifying the  
388 FLAG-tag signal. Levels of p.His778fs were assessed as described in Methods. NT, not transfected;  
389 WT, wild-type; \*\*p < 0.0001. (B) PAM protein expression. SNV expression was assessed using a  
390 FLAG tag antibody and an antibody to a peptide contained in PHMcc (JH246). The lines separating  
391 WT and p.His240Tyr from p.Arg703Gln and p.Phe759Ser indicate that data for two intervening  
392 samples were removed. Molecular weight standards are indicated. (C) PAM protein diagram,  
393 indicating the location of the JH246 epitope (red horizontal line), the FLAG tag (grey diamond), and  
394 the expected location of N- and O-glycans (blue and yellow freeform shapes, respectively). (D)  
395 Glycosylation is altered in a subset of PAM variants. Cell lysates were treated with PNGase F or  
396 neuraminidase as described in Methods. Proteins were visualized using the FLAG antibody. The  
397 samples treated with Neuraminidase were analyzed on two separate gels, with the p.Arg703Gln  
398 samples appearing in part on both gels. Con, control; In, Input; N-Gly, PNGase; Neur, neuraminidase;  
399 NT, not transfected.

400

401 Three SNVs with diminished PAL activity were found in subjects with GH excess leading to  
402 sporadic acromegaly (p.Ser539Trp, p.Gly552Arg) or gigantism (p.Phe759Ser). The relatively  
403 common p.Asp563Gly variant (3.11% global MAF) was observed in persons with different  
404 types of PAs (Table 2). Interestingly, two males with GH excess – one with acromegaly, and  
405 one with gigantism – were compound heterozygotes for p.[Gly552Arg];[Asp563Gly] and  
406 p.[His240Tyr];[Phe759Ser], respectively (Figure S5, Table 1). Although neither the PHM nor  
407 PAL activity of p.His240Tyr (located in PHMcc) differed from WT, its heterogeneous band  
408 pattern and lack of sensitivity to neuraminidase suggest structural alterations sufficient to  
409 alter its trafficking (Figures 3A, 3B, and 3D); its significantly higher prevalence in the cohort  
410 of subjects with PAs vs. controls, and the absence of homozygous individuals in gnomAD,  
411 argue for its classification as a variant of uncertain significance (VUS). Further studies are  
412 necessary to establish or disprove pathogenicity.

413

414 Three of the 15 SNVs were identified in individuals from FIPA families (one variant in each  
415 family, Table 2). SNVs p.Arg80Gln and p.Pro412Leu, which are very rare (MAF: 0.002%),

416 are significantly more prevalent in our cohort vs. controls, and are without homozygous  
417 variant entries in gnomAD. The p.Arg80Gln SNV is located within PHMcc, while the  
418 p.Pro412Leu and p.Glu491Asp SNVs are within the linker region. The p.Arg80Gln did not  
419 segregate with the phenotype in the FIPA kindred and functional studies showed no  
420 significant effect of p.Arg80Gln on PHM enzymatic activity. In contrast, the p.Pro412Leu  
421 variant segregated with the FIPA phenotype and was seen in both the proband (acromegaly)  
422 and the daughter (prolactinoma). Neither of the p.Pro412Leu or p.Glu491Asp variants in the  
423 non-enzymatic linker region had a functional effect on PHM or PAL activity (Figure 3A, Table  
424 3). Altogether, combining allele frequencies in our cohort vs. controls, *in silico* predictions,  
425 functional data, and segregation analysis, our results indicate that the p.Arg80Gln and  
426 p.Glu491Asp variants should be classified as likely benign, while p.Pro412Leu linker region  
427 change is a VUS.

428

#### 429 Functional evaluation of a truncating variant associated with Cushing disease

430 A variant affecting a canonical splice acceptor site (c.2332-2A>T) was present in a pediatric  
431 female (NIH26) with ACTH excess leading to Cushing disease (Table 1). Her parent also  
432 carried the variant and had evidence of disrupted circadian cortisol rhythm, based on  
433 elevated midnight serum cortisol, but did not present clinically overt Cushing disease. The  
434 variant was predicted to cause skipping of exon 21, generating a frameshift that introduces a  
435 premature stop codon, eliminating the C-terminal region of PALcc (p.His778fs, Table 2 and  
436 Figure S6). Skipping of exon 21 was confirmed by testing both the affected subject and  
437 parent blood-extracted RNA (Figure 4A and 4B) and by using a minigene splicing assay  
438 (Figure 4C). Transient expression of p.His778fs in PEAKrapid cells demonstrated, as  
439 expected, that the truncated protein lacked detectable PAL activity; in addition, significantly  
440 reduced levels of PHM activity were also observed (Figure 3A, Table 3). Western blotting  
441 indicated that the mutant protein is produced but at lower levels than those observed for WT.  
442 Moreover, the observed band was smaller than predicted (75 vs. 90 kDa, respectively),

443 suggesting that the mutant might lack some post-translational modifications and/or is  
 444 cleaved at a pair of basic residues introduced by the frameshift (Figure 4D).

445

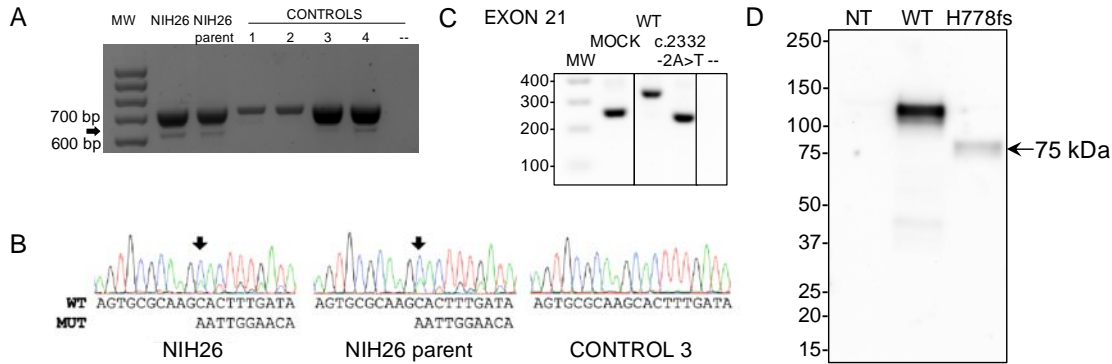

446

447 **Figure 4. Functional studies of the c.2332-2A>T (p.His778fs) truncating variant**

448 (A) RT-PCR analysis of *PAM* exon 21 splicing was performed using blood-extracted RNA from two  
 449 family members carrying the c.2332-2A>T variant (NIH26 and parent) and four WT control cDNAs.  
 450 Primers were designed on exons 17 and 22. Both carriers and controls showed a normally spliced  
 451 transcript (713 bp, upper band), while only the carriers showed an additional alternatively spliced  
 452 transcript lacking exon 21 (the 613 bp band, identified by the arrow). MW, molecular weight marker.

453 (B) The identity of the PCR products (panel A) was confirmed by Sanger sequencing. The arrows  
 454 point to the variant-specific peaks present only in the carriers. MUT, mutated; WT, wild-type. (C)

455 Minigene assay. After transfection into HEK-293 AD cells, mRNA synthesis from the plasmids using  
 456 the cells' own transcription and splicing machinery led to mRNA products containing (WT) or lacking  
 457 (variant) exon 21 of *PAM* flanked by two exons from the pSPL3 vector. The RT-PCR analysis of the  
 458 minigene transcripts was conducted using vector-specific primers. MW, molecular weight marker;  
 459 MOCK, cDNA from empty vector-transfected cells consisting of a 260 bp band made up of fragments  
 460 of pSPL3 exons; --, negative control (RT-PCR without cDNA). The lines separating MOCK and  
 461 negative control from WT and c.2332-2A>T indicate that data for intervening samples were removed.

462 (D) An expression vector lacking exon 21 of human PAM-1 (H778fs) was transiently expressed in  
 463 PEAKrapid cells. Proteins were visualized using an antibody to PHMcc (JH246 PHM Ab). Expression  
 464 of WT PAM produces a major band at  $114 \pm 1$  kDa and a minor one at 105 kDa. The only band visible  
 465 in the cells expressing p.His778fs migrated at 75 kDa; after signal peptide removal, the mass

466 predicted for this protein – which includes only the first 777 residues of WT PAM-1 but extends 45  
467 residues beyond residue 777 before reaching a stop codon – is 90.31 kDa. NT, not transfected.

468

469 Screening for PAM SNVs located in regulatory regions identified two variants that reduce  
470 transcription

471 Next, we extended our screening to regulatory regions of *PAM*, namely the promoter and  
472 untranslated regions (UTRs), to investigate whether there are SNVs with the potential to  
473 impact *PAM* expression. We identified multiple variants and prioritized seven – two in the  
474 promoter, four in the 5'UTR, and one in the 3'UTR – for functional studies (Table 2 and  
475 Figure S7). All SNVs in regulatory regions were observed in the heterozygous state. The  
476 selection criteria we applied for prioritization were analogous to those used for  
477 nonsynonymous variants. *In vitro* evaluation in HEK-293 AD cells using reporter assays, in  
478 which we cloned either the promoter-5'UTR upstream or the 3'UTR downstream of the  
479 luciferase coding sequence, identified two 5'UTR variants, c.-361G>A and c.-133T>C, that  
480 significantly reduced luciferase activity when compared to the WT sequence (Figure 5A). In  
481 contrast, the 3'UTR variant c.\*1455C>T, which was predicted to create new miRNA binding  
482 sites, did not produce any effect on luciferase activity when expressed alongside the  
483 identified miRNAs (Figure S8), indicating that it does not impair *PAM* mRNA stability and  
484 expression. The c.-361G>A variant was identified in two patients with gigantism and in one  
485 individual with a non-functioning PA, while the c.-133T>C variant was present in a pediatric  
486 subject who also harbored the p.Phe31Tyr variant and was affected by CD (NIH36, Table 1);  
487 this genotype will be identified as c.-133T>C(;;)p.Phe31Tyr. Based on *in vitro* enzyme  
488 assays, the p.Phe31Tyr missense SNV diminished neither PHM nor PAL activity to a  
489 significant extent (Figure 3A and Table 3).

490

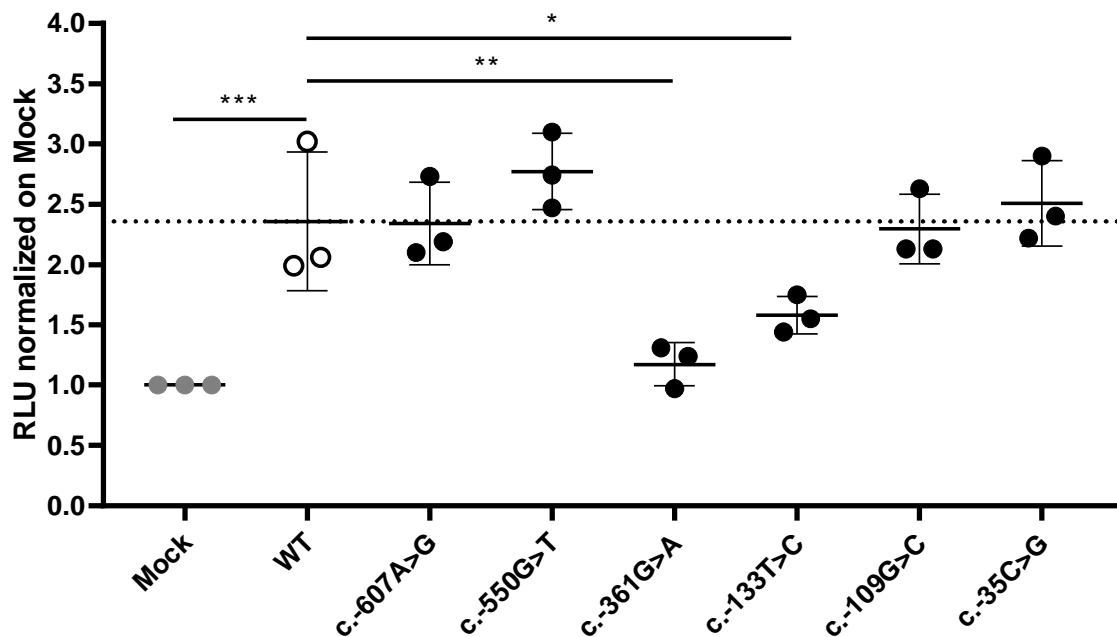

491

492 **Figure 5. WT and mutant PAM promoter activity**

493 A 5 kb PAM promoter-5'UTR WT sequence was cloned upstream of a luciferase reporter. Six mutant  
494 constructs were created by site-directed mutagenesis. The constructs were transiently transfected  
495 into HEK-293 AD cells together with a *Renilla* luciferase reporter for normalization. *Firefly* and *Renilla*  
496 luciferase activities were measured 24 h post-transfection. Two SNVs, c.-361G>A and c.-133T>C,  
497 have significantly lower transcriptional activity than the WT hybrid transcript. Mock, empty pRMT-Luc  
498 vector. Differences between experimental groups were analyzed by 1-way ANOVA with Dunnett's  
499 post hoc test, using WT as the control group. RLU, relative luciferase activity. \*, p = 0.0443; \*\*, p =  
500 0.0019; \*\*\*, p = 0.0005.

501

502 Quantification of PHM and PAL catalytic activities in serum

503 Endoproteolytic cleavage of PAM-1 can occur within the regulated secretory pathway and  
504 after the endocytic retrieval of PAM-1 from the cell surface [16-18]. In addition, several PAM  
505 splice variants encode soluble bifunctional PAM proteins that are secreted along with the  
506 peptide hormones stored in secretory granules [10]. As a result, both PHM and PAL activity  
507 are readily detected in human serum [19, 20]. The anti-coagulants added during the  
508 collection of plasma make the accurate assessment of PHM activity in plasma very difficult.

509 As a result, we could only assess PHM and PAL activity in the small number of serum  
510 samples collected from our cohort. As shown in Figure 6, we measured PHM and PAL  
511 activity and calculated the ratio of PAL to PHM activity for 13 subjects (11 affected  
512 individuals/carriers and two WT controls). To control for the fact that the serum samples  
513 assayed had been stored for varying periods of time, we evaluated the statistical  
514 significance of changes in activity by normalizing PAL activity to PHM activity.  
515

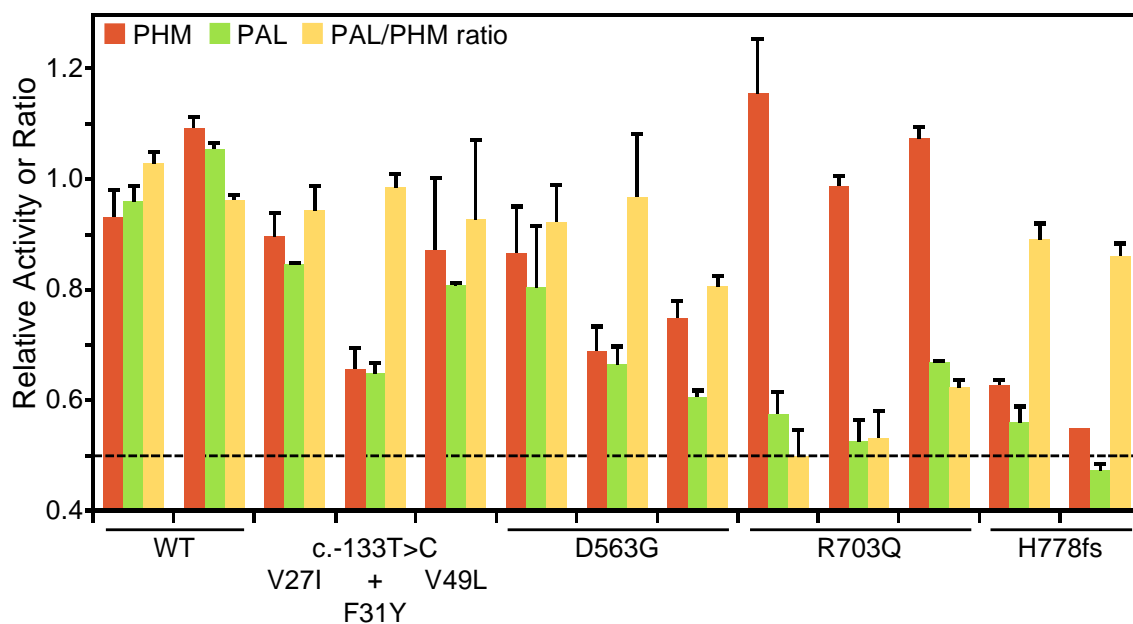

516

517 **Figure 6. PHM and PAL activity in human sera**

518 Assays for PHM and PAL activity were carried out on sera from individuals harboring variants  
519 showing deleterious effects in *in vitro* assays (p.Asp563Gly, p.Arg703Gln, and p.His778fs), subjects  
520 with more benign variants (p.Val27Ile and p.Val49Leu) and controls (WT). In NIH36, the p.Phe31Tyr  
521 variant occurs along with the 5'UTR c.-133T>C variant. The dashed line at 0.5 indicates the activity  
522 level expected with one completely inactive allele. WT, wild-type.

523

524 Several serum samples were available from patients with two SNVs that resulted in the  
525 almost total loss of the PAL activity of PAM-1, p.Arg703Gln (three samples) and p.His778fs  
526 (two samples); consistent with our *in vitro* activity assays of transiently expressed PAM-1  
527 and the total elimination of one allele, serum PAL activity fell by a factor of two for both

528 variants. Also consistent with the data shown in Table 3, serum PHM activity was unaffected  
529 in the p.Arg703Gln variant and was reduced substantially in the p.His778fs variant. Three of  
530 the serum samples available came from subjects carrying SNVs located in PHMcc, but none  
531 significantly reduced the PHM or PAL activity of transiently expressed PAM-1. Strikingly,  
532 both PHM and PAL activities were reduced in the serum sample from NIH36, who harbors  
533 an expression-inhibiting 5'UTR SNV (c.133T>C) in addition to the p.Phe31Tyr SNV. Taken  
534 together, our data indicate that the observed reduction in serum PHM and PAL activity can  
535 be attributed to the 5'UTR SNV, thus confirming the *in vitro* finding. Sera from three different  
536 subjects harboring the p.Asp563Gly variant showed substantial, but variable, reductions in  
537 both PHM and PAL activity. A better interpretation of serum PHM and PAL activity requires  
538 further insight into its multiple potential sources. Altogether, analysis of the limited set of  
539 serum samples available emphasizes the utility of using a wide variety of *in vitro* systems to  
540 evaluate the functional effects of PAM SNVs.

541

#### 542 Loss of heterozygosity (LOH) studies

543 Next, we explored whether PAM acts as a tumor suppressor gene and requires a second  
544 somatic hit affecting the WT allele, as would be expected by the Knudson two-hit hypothesis  
545 [21]. Therefore, we extracted genomic DNA from the PAs surgically removed from  
546 individuals harboring variants with demonstrated deleterious effects and studied LOH by  
547 Sanger sequencing. The available tumors that we analyzed harbored the following variants:  
548 c.-133T>C(;);p.Phe31Tyr, p.Ser539Trp, p.[Gly552Arg];[Asp563Gly], and p.Asp563Gly (n = 1  
549 tested for each SNV). We did not identify loss of the WT allele, suggesting that *PAM* does  
550 not behave like a typical tumor suppressor but may rather be a haploinsufficient gene.  
551 Unexpectedly, in the individual compound heterozygous for p.[Gly552Arg];[Asp563Gly], we  
552 observed loss of the mutant allele causing the change at codon 552 (Figure S9). This likely  
553 represents an instance of *in vivo* reversion to normal of an inherited variant (revertant  
554 mosaicism) [22].

555



556 *PAM* SNVs are significantly associated with a hyperfunctioning pituitary gland

557 Having detected multiple SNVs with deleterious effects on *PAM* protein function in our  
558 cohort, we decided to test whether SNVs within the *PAM* locus are statistically associated  
559 with a pituitary disease phenotype in a larger and more heterogeneous cohort. To this end,  
560 we interrogated the UKBB, a powerful resource for genetic association analyses that  
561 contains exome sequencing data of 200,643 adult individuals with different and well-  
562 annotated pathologies. First, we performed a gene-based association study using the  
563 sequence kernel association test (SKAT) [23, 24]. For this analysis, we considered ICD-10  
564 codes associated with sellar lesions (D352, E220, E221, E222, E229, E237, E240, covering  
565 the following conditions: benign neoplasm of pituitary gland; acromegaly and pituitary  
566 gigantism; hyperprolactinemia; syndrome of inappropriate secretion of antidiuretic hormone;  
567 hyperfunction of pituitary gland, unspecified; disorder of pituitary gland, unspecified; and  
568 pituitary-dependent Cushing's disease, respectively) and SNVs at the *PAM* locus for which  
569 we assigned a weight based on their detrimental effect on protein (see Methods for details).  
570 We set a MAF cutoff of 0.1% for rare variants. *PAM* was identified as significantly associated  
571 (exome-wide) with a diagnosis of hyperfunction of the pituitary gland (E229,  $p = 1.71 \times 10^{-77}$ ,  
572 Figure 7A). Next, we performed single-variant analyses restricted to rare (MAF < 1%) *PAM*  
573 variants with a predicted deleterious effect (CADD\_PHRED score  $\geq 15$ ). We identified nine  
574 missense heterozygous variants (Figure 7B and Figure S10, Table S6), four in PHMcc  
575 (p.Ser97Arg, p.Arg190His, p.Pro192Arg, p.Val351Met), four in PALcc (p.Gly531Cys,  
576 p.Ile554Val, p.Val597Met, p.Pro693Leu) and one in the C-terminal non-catalytic region  
577 (p.Leu856Pro). The p.Ser97Arg variant is located in the loop connecting the  $\beta$ -strand  
578 containing the vicinal His residues that bind  $\text{Cu}_H$  to the preceding  $\beta$ -strand and the  
579 p.Arg190His and p.Pro192Arg variants are both in the short linker that connects the two  
580 homologous domains of PHMcc. PHMcc terminates with Val351; although the final three C-  
581 terminal amino acids are not identified in the crystal structure, removal of four C-terminal  
582 residues produces a protein lacking PHM activity. Two of the PAL variants (p.Gly531Cys



583 and p.Ile554Val) are situated in or near the long loop that forms its hydrophobic substrate  
 584 binding pocket and connects  $\beta$ -strands 2 and 3 of Blade 1. The other two PAL variants  
 585 (p.Val597Met and p.Pro693Leu) are contained within the structural repeats that form Blades  
 586 2 and 4. A study aimed at understanding the effects of luminal pH on the trafficking of rat  
 587 PAM identified the juxtamembrane region that encompasses p.Leu856Pro as a key  
 588 determinant [25].

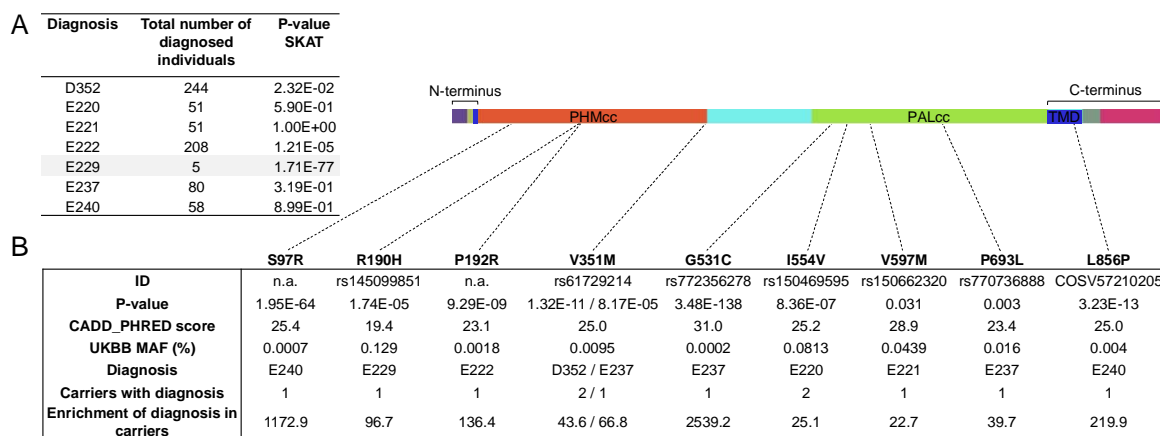

589

590 **Figure 7. Gene- and variant-based association analyses for PAM in the UKBB**

591 (A) Results of SKAT analysis of PAM variants for diagnoses of hyperfunction of the pituitary gland  
 592 (identified from UKBB fields 41270 and 41204 - primary and secondary ICD-10 diagnoses from  
 593 hospitalization records - and 20002 - self-reported diagnosis) in 200,000 UKBB participants. The  
 594 SKAT CommonRare algorithm was used for analysis. (B) Significant enrichment for PAM pathological  
 595 missense PAM variants in subjects diagnosed with hyperfunction of the pituitary gland.

596

597 To complement the analyses conducted on the UKBB, we examined the outputs of a gene-  
 598 specific metric, the gene damage index (GDI) [26]. The GDI score predicts the liability of a  
 599 gene to contain disease-causing mutations by considering the influences of selection and  
 600 genetic drift [27]. For this analysis, we considered 20 genes that harbor germline or somatic  
 601 variants known to predispose to PAs in order to estimate a GDI cutoff above which a gene is  
 602 unlikely to cause a pituitary disease, i.e., it is considered a false positive. PAM was reported  
 603 to have a Phred-scaled GDI score of 3.98, below the calculated cutoff of 4.84 (Table S7).

604 Therefore, our analysis indicates an intolerance to mutational changes for *PAM* in large  
605 population samples, supporting the notion that the observed LOF variants are more likely to  
606 contribute to disease.

607

#### 608 Functional analysis of splicing in other rare variants

609 Among the rare SNVs identified in the UKBB, an intronic SNV (c.2746+3A>T) was predicted  
610 to disrupt the canonical splice donor site of intron 24 (Figure S11A and Table S6); this SNV  
611 was associated with a diagnosis of acromegaly and pituitary gigantism (E220). Our splicing  
612 analysis ascertained that this SNV caused skipping of exon 24 in most transcript molecules;  
613 the expected outcome is the in-frame deletion of 19 residues located within the cytoplasmic  
614 domain (p.(Ala897\_Arg915del)). While the absence of exon 24 does not alter the PHM or  
615 PAL activity of PAM, previous studies indicate that tissue-specific splicing at this site occurs  
616 in the rat and could affect the trafficking of membrane PAM [28-30]. PAM mRNA expression  
617 levels for the mutant allele were about half of WT levels in *in vitro* studies (Figure S11B).  
618 Therefore, an individual harboring this variant is predicted to make 25% less biologically  
619 active PAM protein than healthy controls; if trafficked correctly, a reduced level of this variant  
620 might support normal PAM functions.

621 The finding of two non-coding SNVs affecting *PAM* splicing (albeit with different outcomes)  
622 and recent studies underscoring the importance of evaluating splicing defects as a disease  
623 mechanism for both conditions of hyper and hypopituitarism [31, 32], prompted us to extend  
624 the corresponding functional studies to selected synonymous and intronic variants found in  
625 our cohort (Figure S12A and Table S8). The selection criteria were analogous to those  
626 applied for other prioritized variants. This analysis did not reveal any splicing impairment.  
627 We observed only a possible reduction in mRNA expression by the c.195G>T allele (Figure  
628 S12B), but this was not subsequently confirmed by qPCR studies (Figure S12C).

629 Taken together, these findings indicate that impairment of PAM function or expression via  
630 abnormal splicing is not frequently associated with PAs.

631

## 632 **Discussion**

633 Studies over the last 30 years have identified a small number of germline and somatic  
634 genetic defects associated with the development of different types of PAs. However, the  
635 majority of tumors still do not have a known genetic cause [8]. Here, we report that several  
636 rare variants in the *PAM* gene are associated with pituitary gland hypersecretion and that  
637 most have a deleterious effect on protein function.

638

639 We initially identified a deleterious missense *PAM* variant (p.Arg703Gln) in a FIPA family  
640 with a severe form of childhood-onset pituitary gigantism in which other established causes,  
641 such as X-linked acrogigantism (X-LAG) due to duplications involving *GPR101*, germline *AIP*  
642 mutations/deletions or others, had been ruled out [33, 34]. Among the genes filtered from the  
643 WES screening, the high level of *PAM* expression in the pituitary gland and its known  
644 functions in the pituitary and other endocrine cells made *PAM* the prioritized candidate. A  
645 bifunctional enzyme that is essential for the biosynthesis of multiple pituitary and  
646 hypothalamic peptide hormones, *PAM* affects regulated secretion and is involved in the  
647 biogenesis of secretory granules [10, 11, 35, 36]. Based on site-directed mutagenesis and  
648 crystallographic studies of rat PALcc, this Arg residue (Arg 706 in rat *PAM*) is located at the  
649 active site and participates in substrate binding; site-directed mutagenesis of this residue to  
650 Gln reduced the activity of PALcc by a factor of four, and mutagenesis to Ala decreased  
651 activity by 97% versus WT [13]. Or functional studies on bifunctional human *PAM* with the  
652 Arg703 to Gln mutation revealed an even greater decrease in its PAL activity (1% relative to  
653 WT human *PAM*), while retaining fully normal PHM activity.

654

655 This intriguing finding prompted us to explore whether LOF *PAM* variants (SNVs and CNVs)  
656 were associated with other types of anterior pituitary adenomas, occurring both in familial  
657 and sporadic settings. No other likely deleterious *PAM* SNVs were observed in the familial  
658 cases examined, making the estimated frequency of *PAM* LOF variants in our FIPA kindreds

659 5.56% (1/18). A very rare VUS, p.Pro412Leu, located within the linker region connecting the  
660 two enzymatic domains was identified in a heterogeneous FIPA kindred.

661

662 We detected six germline SNVs with deleterious effects on protein function/expression in  
663 sporadic PA cases. Two variants (p.Ser539Trp, p.Asp563Gly) are relatively common in the  
664 general population (global MAF range: 0.42-3.11%). The remaining four variants are very  
665 rare (MAF < 0.01%), were found in one subject each, and were significantly enriched in our  
666 cohort compared to the general population. Two of these variants (p.Gly552Arg and  
667 p.Phe759Ser) were identified in subjects with GH excess (2/173, frequency: 1.16%) and two  
668 (c.-133T>C and p.His778fs) in cases with pediatric CD (2/81, frequency: 2.47%).

669

670 The p.Ser539Trp and p.Asp563Gly mutants were previously implicated as major risk factors  
671 for type 2 diabetes [37, 38], and an important question is whether these proteins are  
672 enzymatically active. When introduced into human PAM-1 and assayed in cell lysates, the  
673 p.Ser539Trp variant had 50% of normal PHM activity, lacked detectable PAL activity, and  
674 was not normally sialylated, suggesting its abnormal intracellular trafficking. When  
675 expressed as a soluble protein containing both PHMcc and PALcc, secretion of the  
676 p.Ser539Trp protein was not detected, precluding assessment of its catalytic activity [15].  
677 We prepared two independent p.Ser539Trp plasmid constructs, sequenced both and verified  
678 that both constructs were correct. The p.Ser539Trp mutation disrupted the normal trafficking  
679 of membrane PAM; when present in the soluble protein, the same variant may inhibit its  
680 secretion [15]. Using an assay to quantify PAM activity (PHM followed by PAL) by measuring  
681 glyoxylate production from hippuric acid, *Thomsen et al.* reported that the p.Asp563Gly  
682 mutation was about 50% active [15]. Our assays, which assess PHM and PAL activity  
683 separately, showed that the PHM activity of p.Asp563Gly was slightly less than half that of  
684 WT PAM, while its PAL activity was only one seventh that of WT PAM.

685

686 Our *in vitro* functional tests indicated an impairment in enzymatic activity for five missense  
687 SNVs and the splicing variant (in PAL). *PAM* expression was decreased for two 5'UTR  
688 variants and the COOH-terminal region splicing variant. In addition, glycosylation was  
689 abnormal for four of the five missense SNVs. Experimental truncations used to define the C-  
690 terminus of rat PALcc are consistent with the lack of PAL activity observed for p.His778fs,  
691 with the same inability of the truncated rat protein to fold correctly, thereby preventing its  
692 secretion [39]. Our functional data indicate a similar behavior for the human variant, along  
693 with a significant reduction in PHM activity.

694

695 We also showed that measurement of PHM and PAL activity in the serum of subjects  
696 harboring *PAM* variants correlates well with the corresponding values for each single variant  
697 determined using the PEAKrapid assay system. The CD case that harbored a regulatory  
698 variant reducing *PAM* expression was instructive in this regard. In that case, both PHM and  
699 PAL activities were lowered to the same extent (about 40% compared to WT), with the PAL  
700 to PHM ratio showing a normal value, suggesting that enzymatic activity was not affected.  
701 These observations indicate that it is valuable to explore whether assays of PHM and PAL  
702 activity in sera could be used as a biomarker of pituitary disease. The recent development of  
703 an efficient high-throughput amidation assay [20] could aid in this endeavor.

704

705 The association of loss-of-function *PAM* SNVs with PAs was further explored by screening  
706 200,000 exomes from the UKBB. Supporting our findings, *PAM* was significantly associated  
707 with a diagnosis of pituitary hyperfunction (ICD-10 code E229) and nine rare (MAF < 1%)  
708 missense variants, all predicted to be pathogenic, were associated with diagnoses of sellar  
709 lesions. Although the UKBB cohort has an inherent selection bias towards healthy  
710 volunteers, and disease annotation may be self-reported in some cases or only after hospital  
711 admission in others (thereby potentially excluding mild or undiagnosed pituitary  
712 hypersecretion diagnoses), the validation of our findings related to *PAM* variants in an  
713 independent cohort more representative of the general population strengthens the observed

714 associations. Based on previous studies, each of the nine *PAM* variants identified in the  
715 UKBB (four in PHMcc, four in PALcc, and one in the juxtamembrane region of the luminal  
716 domain) is expected to disrupt enzymatic activity or trafficking of membrane *PAM* bearing  
717 these mutations.

718

719 We did not observe LOH for *PAM* variants. This suggests that *PAM* does not behave as a  
720 classical tumor suppressor gene, leading us to propose that pathogenic LOF *PAM* variants  
721 act as haploinsufficient alleles. This hypothesis is supported by *in silico* predictions (HI and  
722 HIPred scores for *PAM* are 0.588 and 0.7057, respectively) [40, 41], and by previous  
723 observations that *Pam* haploinsufficiency impairs several interdependent organ systems in  
724 *PAM*<sup>+/-</sup> mice. Although a complete lack of *Pam* is not compatible with life [42], mice with a  
725 single functional copy of *Pam* developed increased adiposity and mild glucose intolerance  
726 with age [42], were deficient in their ability to maintain body temperature in the cold [43], and  
727 showed an increase in anxiety-like behavior [44]; these findings are consistent with defects  
728 in  $\beta$ -cell function, the vascular system, and neuronal/neuroendocrine function, respectively.  
729 Production of the few amidated peptides tested was not greatly altered by *PAM*  
730 heterozygosity [42, 45, 46], but the production of amidated TRH in the hypothalamus was  
731 compromised and the mice were deficient in their pituitary response to hypothyroidism [43].  
732 Moreover, pituitary levels of POMC-derived amidated peptides (diAc- $\alpha$ -MSH,  $\alpha$ -MSH, and  
733 JP) were significantly increased in *PAM*<sup>+/-</sup> mice [46]. These data, together with our  
734 observation that rare and functionally deleterious *PAM* SNVs are associated with anterior  
735 pituitary hyperfunction, suggest that the pituitary gland is particularly sensitive to *PAM*  
736 haploinsufficiency. Moreover, they indicate that changes in gene expression associated with  
737 *PAM* heterozygosity are tissue-specific and that both amidation-dependent and amidation-  
738 independent mechanisms (for instance, the secretagogue-mediated translocation of the  
739 soluble cytoplasmic *PAM* fragment to the nucleus affecting gene expression in a cell-type  
740 specific manner) [11, 47, 48] likely underlie the described deficits. It will be interesting to

741 study in further detail whether any of the phenotypes observed in PAM<sup>+/-</sup> mice are also  
742 present in individuals with PAs that harbor LOF *PAM* variants.

743

744 Limitations to our current study include the fact that only a few subjects with sporadic non-  
745 functioning tumors and families with multiple endocrine neoplasia were screened. To better  
746 estimate the prevalence of *PAM* variants and their possible contribution to pituitary  
747 tumorigenesis, the search for *PAM* variants needs to be extended to those subtypes as well  
748 as cohorts with hyperprolactinemia (tumoral or non-tumoral), the most common form of  
749 pituitary hypersecretion. In particular, it would be interesting to better assess the risk that the  
750 relatively common p.Asp563Gly variant confers to the development of pituitary  
751 hyperfunction, particularly in the homozygous state. The variable PAL activity measured in  
752 PA subjects that were heterozygous for this variant suggests that other factors, such as  
753 genetic, biochemical or dietary (e.g., copper or vitamin C availability, hypoxia) [19],  
754 contribute to the regulation of *PAM* expression and/or activity and, hence, predisposition to  
755 pituitary dysfunction and potentially tumorigenesis. Second, our LOH and serum activity  
756 analyses were limited to the small number of available PAs and serum samples,  
757 respectively. It will be important to screen more tumors harboring deleterious *PAM* variants  
758 to definitively exclude the absence of LOH. Likewise, assessing circulating PHM and PAL  
759 activity in more *PAM* variant carriers will better define their risk profile. Third, the question of  
760 how disordered *PAM* function leads to increased hormonal secretion and/or pituitary tumor  
761 development remains to be determined. *PAM* is a complex, multifunctional protein involved  
762 in several pathways related to the regulation of secretion; disruption of one or more of these  
763 pathways could play a role in hormonal hypersecretion (Figure 8).

764



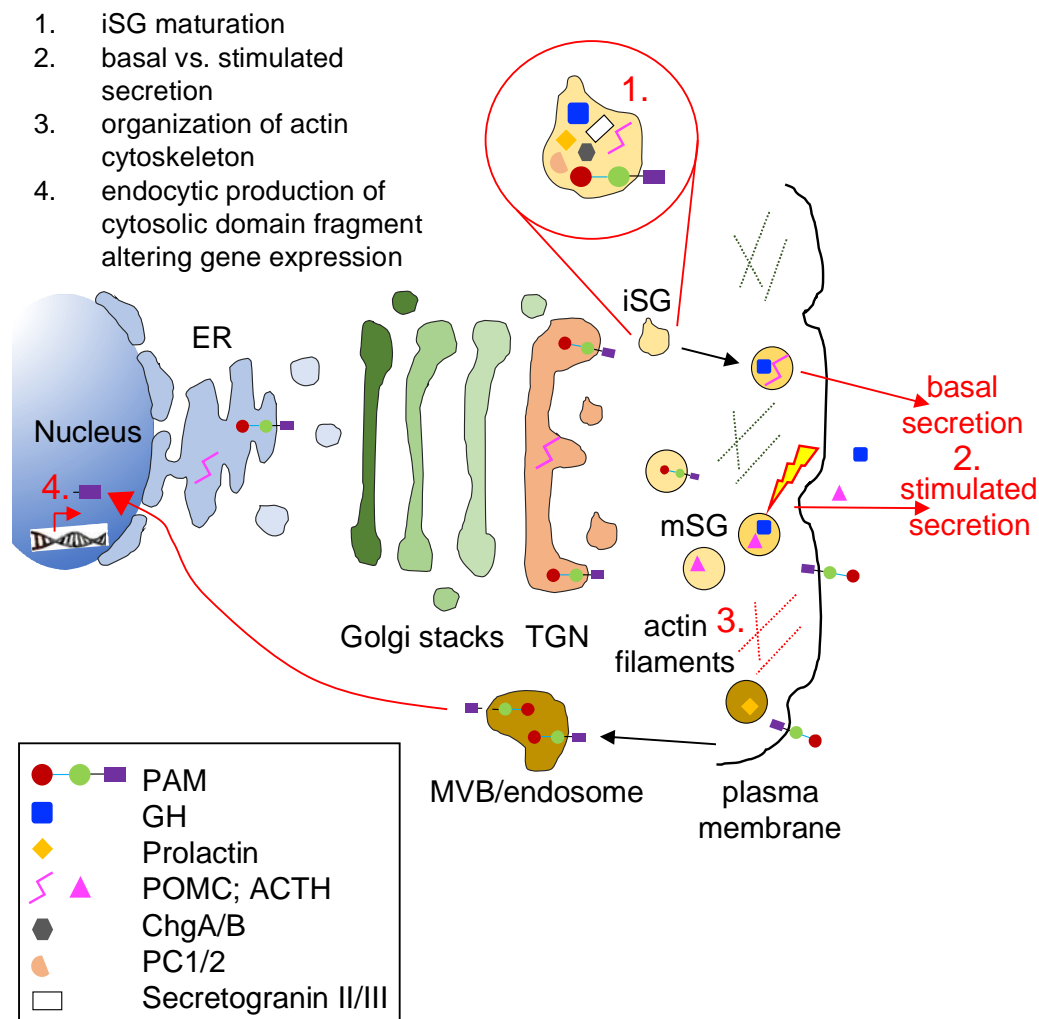

765

766 **Figure 8. Biological processes and cellular components that might be affected by PAM**  
 767 **haploinsufficiency in pituitary hormone-secreting cells**

768 The trafficking of integral membrane PAM and pituitary hormones through the regulated secretory  
 769 pathway is depicted. Immature secretory granules (iSG) budding from the *trans*-Golgi network (TGN)  
 770 contain prohormones and processing enzymes like the prohormone convertases (PCs), granins  
 771 [chromogranins A and B (ChgA/B) and secretogranins II and III], and PAM. Mature secretory granules  
 772 (mSG) release their soluble content during regulated exocytosis (the yellow lightning bolt represents  
 773 the external stimulus triggering secretion). Basal rates of hormone secretion from pituitary cells are  
 774 less than 1% of the cell content/hour. Although PAM appears on the cell surface during exocytosis, its  
 775 rapid endocytosis means that very little PAM remains on the plasma membrane at steady-state.  
 776 Cleavage by secretase-like enzymes can generate a soluble, cytosolic fragment of PAM that can  
 777 enter the nucleus, where it relays information about the status of the secretory granule pool. Several



778 *in vitro* studies have shown that PAM misexpression can affect a variety of steps in the regulated  
779 secretory pathway; these are highlighted in red in the cartoon and include SG formation, basal and  
780 stimulated secretion, actin cytoskeleton organization, and gene expression. ER, endoplasmic  
781 reticulum; GH, growth hormone; MVB, multivesicular body.

782

783 In our study pathological PAM variants were associated with hypersecretion of both  
784 amidated and non-amidated pituitary hormones, which suggests that the altered PAM  
785 function may affect a different target than the hormones themselves. Granin proteins,  
786 including chromogranin A and B are crucial factors in hormonal secretion. Chromogranin A-  
787 derived peptides such as pancreastatin are themselves targets for amidation by PAM [49],  
788 such that changes in PHM and PAL function could alter the packaging and release of  
789 hormones contained in secretory granules. Separately, the linker region connecting the PHM  
790 and PAL enzymes is O-glycosylated and pH sensitive and is known to influence PAM  
791 function and its effects on vesicular trafficking [50].

792 In AtT-20 cells, expression of the PAM-1 isoform without soluble PHM and PAL leads to  
793 accumulation of uncleaved POMC in the trans-Golgi network; however, while PAM-1  
794 expression decreased secretagogue-stimulated secretion by mature granules, it increased  
795 basal secretion of larger POMC peptides [35]. More recently, it has been shown that in atrial  
796 myocytes proANP storage is a highly PAM-dependent process even though neither proANP  
797 nor ANP itself are amidated proteins. Also, in murine atrial cells devoid of PAM that have  
798 depleted proANP storage, the reintroduction of PAM facilitated proANP storage. Crucially,  
799 this effect occurred irrespective of whether normal or enzymatically inactivated PAM was  
800 used [51, 52]. Interestingly, the depletion of proANP in the absence of PAM was  
801 unaccompanied by decreased proANP mRNA or protein biosynthesis, but rather occurred  
802 due to 3-fold increased basal ANP secretion. Bäck, Mains & Eipper recently suggested that  
803 PAM may also have a role as a cargo receptor that directly binds to and protects proANP  
804 soon after its synthesis in the rough endoplasmic reticulum through to newly formed  
805 granules [9, 51]. A potential role for PAM as a cargo receptor in pituitary cells remains to be

806 explored. Taken together, these data underline the multiple roles that PAM can play in  
807 secretion of hormones. Studies of emerging PAM actions will be needed to address the  
808 influence of genetic variants in this study on PAM-mediated pituitary hormone release.

809

810 In conclusion, *PAM* was identified as a candidate gene associated with pituitary  
811 hypersecretion. Our comprehensive analysis of the impact of multiple *PAM* variants on  
812 protein function can also improve our understanding of other endocrine disorders recently  
813 linked to PAM defects, such as type 2 diabetes. Together, these new results raise the  
814 prospect of therapeutically targeting PAM function to influence disease in the pituitary and  
815 elsewhere across the endocrine system.

816

## 817 **Materials and Methods**

818

819 The study population consisted of index cases and a validation cohort.

820 The index cases were part of a three member FIPA acro-gigantism family referred to the  
821 National Institutes of Health Clinical Center (NIHCC) as part of the Undiagnosed Diseases  
822 Program (UDP) [53-55]. The presence of germline SNVs/CNVs in genes known to  
823 predispose to pituitary tumors (*AIP*, *GPR101*, *CDKN1B*, *MEN1*, *PRKAR1A*, *GNAS*, and  
824 *DICER1*) had been previously ruled out in all affected individuals.

825

826 The validation cohort consisted of 359 individuals with PAs (Table S1). Germline DNA was  
827 studied in 299 unrelated individuals with sporadic PAs, in 17 FIPA families (including 19  
828 individuals), and in three families with syndromic presentations of PAs and other endocrine  
829 tumors (MEN-like syndromes) [7, 56]. Among the sporadic cases, 173 had somatotroph  
830 adenomas (40 had pituitary gigantism), 84 had Cushing disease associated with corticotroph  
831 adenomas (CD, 81 were pediatric - age < 18 years at diagnosis - and one had Nelson  
832 syndrome), four had silent corticotroph adenomas, 25 had lactotroph adenomas (six were  
833 pediatric, one was a carcinoma), and 13 had clinically non-functioning or silent adenomas  
834 (one was pediatric). Somatic PA DNA was available from additional 38 subjects with  
835 sporadic acromegaly; five of them had matched germline DNA [7, 57]. Twenty-two of the  
836 pediatric CD cases (one familial and 21 sporadic) had matched tumor DNA available [56].  
837 Subjects for the study were recruited from the Centre Hospitalier Universitaire (CHU),  
838 University of Liège (231), the NIH (90), and the Bicêtre Hospital and Foch Hospital Paris  
839 (38).

840

841 UDP patients provided written informed consent under clinical protocol 76-HG-0238,  
842 “Diagnosis and Treatment of Patients with Inborn Errors of Metabolism and Other Genetic  
843 Disorders”, approved by the NHGRI Institutional Review Board. Other individuals from the  
844 NIH were recruited between 1997-2017 under research protocol 97-CH-0076

845 (ClinicalTrials.gov: NCT00001595). The study was approved by the *Eunice Kennedy Shriver*  
846 National Institute of Child Health and Human Development (NICHD) Institutional Review  
847 Board and by the Ethics Committee of the University of Liège, Belgium. Affected subjects or  
848 their relatives signed informed consent or assent forms approved by the local ethics  
849 committee. Parents and siblings of the affected individuals were also recruited, when  
850 appropriate and available.

851

## 852 DNA sequencing

853 Index cases: DNA was extracted from peripheral whole blood samples of the twin probands  
854 affected with gigantism from generation II, their father, two unaffected siblings, and the three  
855 individuals from generation III (sons of II-2). Whole exome sequencing (WES) was  
856 performed by a commercial vendor (Axeq Technologies, Rockville, Maryland) using the  
857 TruSeq Human Exome 62 Mb capture kit for library preparation for individuals from  
858 generation I and II. Exome sequencing was completed using the Illumina HiSeq2000  
859 platform resulting in raw sequence FASTQ files. WES in individuals from generation III (and  
860 in II-2 as control for kit-specific artifacts) was performed using the NimbleGen SeqCap EZ  
861 Exome Library v3.0 kit (Roche) for library preparation. Exome sequencing was completed  
862 using the Illumina NovaSeq 6000 platform. Alignments were made to human reference  
863 assembly GRCh38 using BWA-MEM [58]. Variant calling and joint genotyping were  
864 performed using GATK Best Practices (GATK ver. 4.2.3.0, HTSJDK ver. 2.24.1, Picard ver.  
865 2.25.4) [59]. The VCF files were annotated with population data from the gnomAD database  
866 (ver. 3.1.2). Functional and predictive annotations were attached using Ensembl Variant  
867 Effect Predictor (ver. 102) [60] and the dbNSFP (ver. 4.3a) [61] database. Pathogenicity  
868 predictions used in filtering came from SIFT, ClinPred, PolyPhen-2, FATHMM, and  
869 Combined Annotation Dependent Depletion (CADD) score. No known disease-causing or  
870 damaging biallelic/hemizygous variants segregating to the affected status were identified.  
871 Slivar [62] was used to filter the variants and apply pedigree analysis. We prioritized rare  
872 heterozygous damaging variants with nonzero pituitary median expression from GTEx that

873 appear in affected individuals for downstream validation and analysis, excluding variants  
874 with a population minor allele frequency (MAF) > 1%. Variants reported in the ClinVar and/or  
875 the UniProt databases as benign or likely benign were also excluded. PCR (GoTaq Green  
876 Master Mix, M7123, Promega) and Sanger sequencing (BigDye Terminator 3.1 Cycle  
877 Sequencing Kit, 4337456, ThermoFisher Scientific) were used to confirm the *PAM* variant  
878 identified by WES. Sequences were aligned and analyzed using the SeqMan Pro 11.1.0  
879 (DNASTAR Lasergene) software. Sequence chromatograms were visualized using  
880 SnapGene Viewer ver. 5.0.4.

881

882 Validation cohort: WES data on germline and tumor DNA samples from subjects with CD  
883 were generated as described previously [56]. These WES datasets were manually assessed  
884 using Integrative Genomics Viewer ver. 2.12.3 platform (Broad Institute) [63]. For all other  
885 subjects in the validation cohort, genomic DNA was extracted from peripheral blood and  
886 screened for *PAM* variants by Sanger sequencing. Whenever a *PAM* pathogenic/likely  
887 pathogenic variant was identified and family members were available for analysis, cascade  
888 screening was initiated. This led to two instances of genotype-positive family members. In 38  
889 individuals with sporadic acromegaly, tumor DNA was available for analysis. However, due  
890 to the limited amount of DNA available, Sanger sequencing was targeted to specific regions  
891 of *PAM* where the majority of likely pathogenic variants were previously observed (Figure 2),  
892 i.e., the proximal promoter and exons 9, 16, 18, 19, 20, and 21. The primers included in  
893 Table S2 were used to amplify the promoter and 5'UTR regions, the coding regions and  
894 exon–intron junctions by PCR, and for Sanger sequencing. In the available adenomas, DNA  
895 was extracted from unstained sections using the Pinpoint Slide DNA Isolation System  
896 (D3001, Zymo Research) and loss of heterozygosity (LOH) was investigated by Sanger  
897 sequencing. The NC\_000005.9(NM\_000919.3) reference sequence was used to annotate  
898 *PAM* variants.

899

900 Single cell RNA sequencing (scRNA-seq) analysis: Figure S2A was derived from data  
901 published in the NCBI Gene Expression Omnibus (GEO) Series (accession number  
902 GSE132224) using methods described in detail [64]. Briefly, scRNA-seq data were derived  
903 from freshly dispersed rat anterior pituitary cells from postpubertal males (3,562 cells) and  
904 diestrus females (3,334 cells). Cell type clusters were identified using known genetic  
905 markers for secretory cell types, folliculostellate cells, erythrocytes, leukocytes, and  
906 endothelial cells. Here, we examined the expression levels of the *Pam* gene and the  
907 percentage of cells of each type expressing this gene, plotted as tSNE map [65] and  
908 percent-expressing heatmaps using Matlab (R2018b).

909

#### 910 CNV analysis

911 Sixteen pituitary gigantism patients and 121 other individuals with different subtypes of PAs  
912 were tested for germline *PAM* deletions/duplications by droplet digital PCR (ddPCR) using  
913 five FAM-labeled TaqMan CNV assays spanning the entire *PAM* gene (Hs03560663\_cn in  
914 intron 2, Hs03041534\_cn in intron 5, Hs06720527\_cn in intron 13, Hs06071620\_cn in intron  
915 16, Hs06028580\_cn in exon 25, all ThermoFisher Scientific). The VIC-labeled *RPP30*  
916 (*Rnase P*) assay (4403326, ThermoFisher Scientific) was used as an internal control. All  
917 PCR reactions were prepared using the ddPCR SuperMix for Probes (no dUTP, 1863024,  
918 Bio-Rad) and the HindIII restriction enzyme in a QX200 Droplet Digital PCR System (Bio-  
919 Rad). Results were analyzed with Quanta Soft software ver. 1.7.4.0917 (Bio-Rad).

920

#### 921 Allele phasing

922 The PacBio long seq run was employed to determine the phasing of *PAM* variants c.718C>T  
923 (p.His240Tyr) and c.2276T>C (p.Phe759Ser), located 60 kb apart (exons 9 and 20,  
924 respectively), in a person with sporadic gigantism. His parents were not available for genetic  
925 studies. Briefly, we employed Single Molecule, Real Time (SMRT) Sequencing technology  
926 and a Sequel sequencer (Pacific Biosciences, Menlo Park, CA). The general strategy was to  
927 generate a whole-genome library, then perform a hybridization-based pulldown to enrich for

928 the genomic region including the two variants. The probes were targeted against  
929 chr5:102,939,611-103,019,811 (hg38 coordinates). This encompasses the positions of the  
930 two variants plus an extra 10 kb upstream and downstream for a total of about 83 kb. The  
931 biotinylated xGen Lockdown Probes were designed and synthesized by IDT (Coralville, IA)  
932 with one probe approximately every 1 kb, for a total of 86 probes. The long reads enable  
933 heterozygous variant walking to determine phasing of the variants. The library was  
934 constructed according to the Pacific Biosciences protocol given at [https://www.pacb.com/wp-](https://www.pacb.com/wp-content/uploads/Procedure-Checklist-%E2%80%93-Multiplex-Genomic-DNA-Target-Capture-Using-IDT-xGen-Lockdown-Probes.pdf)  
935 [content/uploads/Procedure-Checklist-%E2%80%93-Multiplex-Genomic-DNA-Target-](https://www.pacb.com/wp-content/uploads/Procedure-Checklist-%E2%80%93-Multiplex-Genomic-DNA-Target-Capture-Using-IDT-xGen-Lockdown-Probes.pdf)  
936 [Capture-Using-IDT-xGen-Lockdown-Probes.pdf](https://www.pacb.com/wp-content/uploads/Procedure-Checklist-%E2%80%93-Multiplex-Genomic-DNA-Target-Capture-Using-IDT-xGen-Lockdown-Probes.pdf), except that SeqCap EZ reagents and the  
937 SeqCap Library SR User's Guide (Roche, Indianapolis, IN) were used for the hybridization  
938 pulldown. Briefly, the genomic DNA was fragmented using a g-TUBE (Covaris, Woburn, MA)  
939 and Pacific Biosciences linear adapters were ligated to the ends to generate a library with an  
940 average insert length of about 10 kb. The region of interest was pulled down using a pool of  
941 400 attomoles of each of the 86 probes described above. The resulting material was  
942 amplified and SMRTbell adapters were ligated to the ends. This library was sequenced on a  
943 Sequel (Pacific Biosciences) on a SMRT Cell 1M v2 cell with Sequencing kit 2.1 and a 10 hr  
944 acquisition time. The resulting reads were analyzed using the program "Targeted Phasing  
945 Consensus" from Pacific Biosciences ([https://github.com/PacificBiosciences/targeted-](https://github.com/PacificBiosciences/targeted-phasing-consensus)  
946 [phasing-consensus](https://github.com/PacificBiosciences/targeted-phasing-consensus)) to perform the read phasing and alignment using CCS reads (circular  
947 consensus sequences from 3+ passes), basic subreads, and the hg38 genome for the target  
948 region.

949

950 A male with sporadic acromegaly harbored *PAM* variants c.1654G>A (p.Gly552Arg) and  
951 c.1688A>G (p.Asp563Gly), both located in exon 16. To determine the phasing of these  
952 closely located SNVs, exon 16 was PCR-amplified from his germline DNA and the PCR  
953 product cloned into the TOPO-TA vector. Transformed bacterial colonies were screened for  
954 the presence of the variants by PCR and Sanger sequencing.

955

956 Bioinformatic analyses

957 Variant pathogenicity and gene damage predictions: Besides the bioinformatic tools used in  
958 the variant prioritization process, Alamut Visual ver. 2.9 software (Interactive Biosoftware)  
959 was used for annotation, *in silico* prediction, and for determining the frequency in public  
960 databases of all the *PAM* variants identified. For nonsynonymous variants, unless specified,  
961 the computational verdict was based on the combined outputs of 19 software packages  
962 available in Varsome (accessed on 11/24/2022. Five algorithms (Splice Site Finder, MaxEnt,  
963 NNSplice, GeneSplicer and Human Site Finder) integrated in Alamut were used for splicing  
964 variants. Variants were considered probably damaging or affecting splicing when most of the  
965 algorithms agreed; otherwise, they were considered variants of uncertain significance (VUS).  
966 The gene damage index (GDI) [26] score for *PAM* and other genes known to predispose to  
967 pituitary tumors was retrieved from The Gene Damage Index Server.

968

969 Spatial clustering analysis: The spatial clustering of a set of variants is obtained by  
970 calculating the geometric mean distance between all pairs of variants and normalizing them  
971 to the gene's cDNA length (2,922 bp, isoform P19021-5). An empirical p-value is calculated  
972 by randomly-generating 100,000 permutations of the variants and comparing their clustering  
973 distance against the clustering of the actual variants. As input, we used the 16 prioritized  
974 missense and truncating variants found in the index cases and validation cohort and  
975 reported in Table 2. We then classified the number of variants located in particular domains  
976 of the protein (converted to cDNA coordinates) and counted the number of variants  
977 appearing in each domain across all the permutations to calculate an empirical p-value  
978 comparing the actual number of variants found in each domain to the number of variants in  
979 each domain of the 100,000 permutation analysis.

980

981 Promoter analysis: The computational search for transcription factor binding sites within the  
982 promoter region of *PAM* was executed using Genomatix. The MatInspector ver. 3.1 tool of  
983 Genomatix (Matrix Library 11.0) was used with a core similarity threshold of 0.75 and an



984 optimized matrix similarity threshold to search for the presence of transcription factor binding  
985 sites. We limited our search to vertebrate general core promoter elements and the + strand.  
986

987 Protein sequence alignment and structural analysis: Protein sequence alignments were  
988 performed using the following sequences from UniProt and Clustal Omega: human PAM-1  
989 (P19021-5), chimpanzee PAM-1 (A0A2I3SM67-1), rat PAM-1 (P14925-1), *Aplysia* PAM-1  
990 (Q9NJI4-1), *Drosophila* PHM (O01404-1) and PAL2 (Q9W1L5-1), and *Chlamydomonas*  
991 PAM (A0A0S2C767-1). The enzymatically active cores for PHM and PAL were aligned.  
992 Enzyme activity has been demonstrated for each of these proteins except *Aplysia* and  
993 chimpanzee [39, 66-71]. We included chimpanzee as this species is evolutionarily close to  
994 human, rat because both its PHM and PAL domains have been crystalized and extensively  
995 analyzed [13, 72], *Aplysia* and *Drosophila* to cover other major families, and  
996 *Chlamydomonas* as the most evolutionarily distant species at the boundary of the  
997 animal/plant kingdoms. Full-length alignments are available in the Supplemental Methods.  
998 Ribbon diagrams of the crystal structures of the catalytic cores of rat PHM (PHMcc) (PDB:  
999 1OPM) and PAL (PALcc) (PDB: 3FW0) were used to contextualize the identified variants.  
1000 3D models were generated using the PyMOL molecular graphics system (Schrödinger,  
1001 LLC). Rat PHMcc and PALcc are, respectively, 93% and 92% identical to human PHMcc  
1002 and PALcc.

1003

1004 Analysis of PAM SNV enrichment in pituitary diagnoses from the UK Biobank (UKBB) cohort  
1005 UKBB dataset and disease annotation: The UKBB is a prospective study that recruited  
1006 502,611 participants aged 38 to 73 years from 22 sites across the UK with baseline  
1007 measures collected between 2006 and 2010 [73]. This research was conducted using the  
1008 UKBB Resource (Application Number 48008). The UKBB obtained ethics approval from the  
1009 North West Multi-centre Research Ethics Committee (approval number: 11/NW/0382) and  
1010 obtained informed consent from all participants. Diagnoses of hyperfunctioning pituitary  
1011 diseases were retrieved from hospital inpatient diagnosis fields 41270, 41202, 41204, with

1012 International classification of diseases (ICD-10) codes E220 (acromegaly and pituitary  
1013 gigantism), E221 (hyperprolactinemia), E222 (syndrome of inappropriate secretion of  
1014 antidiuretic hormone), E229 (unspecified hyperfunction of the pituitary gland), E240-E248-  
1015 E249 combined as E240 (pituitary-dependent Cushing disease), D352-D359 combined as  
1016 D352 (benign neoplasm of pituitary gland), E237 (disorder of pituitary gland), or as self-  
1017 reported medical condition with codes 1237 (disorder of pituitary gland combined with ICD-  
1018 10 code E237), 1238 (pituitary adenoma/tumor combined with ICD-10 code D352), 1239  
1019 (Cushing's syndrome combined with ICD-10 code E240), 1431 (hyperprolactinemia  
1020 combined with ICD-10 code E221), 1429 (acromegaly combined with ICD-10 code E220).

1021

1022 SKAT analysis: Gene-based diagnosis-association analysis was performed on 200,643  
1023 individuals for whom exome sequencing data were available using the Sequence Kernel  
1024 Association Test (SKAT). The R package SKAT was employed [24]. We used the  
1025 CommonRare algorithm for binary traits with the adaptive sum method to account for  
1026 common and rare variants within the *PAM* gene, using a MAF cutoff of 0.1% and considering  
1027 the weight of the SNVs based on their detrimental effect on protein. SNV weights were  
1028 assigned as previously described [74] and adapted as follows:

- 1029 • weight of 5 for UTR variants, synonymous variants, splice region variants;
- 1030 • weight of 10 for protein altering variants;
- 1031 • weight of 20 for start lost, stop lost, in-frame deletions, in-frame insertions;
- 1032 • for missense variants, weight of 20 + score from combined PolyPhen-2 and SIFT  
1033 predictions: PolyPhen-2 +10 if possibly damaging or +20 if probably damaging or +5  
1034 if unknown; SIFT +20 if deleterious, +0 if tolerated;
- 1035 • weight of 75 for frameshift variants, nonsense, splice acceptor variants, splice donor  
1036 variants;
- 1037 • weight of 100 for transcript ablation.

1038 Statistical significance for gene-based tests was set at a Bonferroni-corrected threshold of  $p$   
1039  $< 2 \times 10^{-6}$  (threshold for 25,000 genes).

1040

1041 Analysis of SNVs in UKBB: Analysis of SNVs in UKBB individuals with pituitary diagnoses  
1042 was performed with PLINK and a custom code in Python ver. 3.7. The CADD v1.660 VEP  
1043 plugin was used to provide prediction scores for their detrimental effect. A CADD\_PHRED  
1044 score of  $\geq 15$  and a MAF  $< 1\%$  were considered as pathogenicity criteria.

1045

1046 Functional characterization of SNVs

1047 Cell lines: The PEAKrapid (ATCC CRL-2828) and HEK-293 AD (ATCC CRL-1573) cells are  
1048 lines derived from the Human Embryonic Kidney (HEK)-293 cell line. The PEAKrapid cells  
1049 were maintained in Dulbecco's modified Eagle's medium (DMEM)-F12, with 10% fetal  
1050 bovine serum (FBS, Hyclone), pen-strep, and HEPES to net 25 mM, while the HEK-293 AD  
1051 cells were maintained in DMEM containing low glucose, pyruvate, 2 mM glutamine (Gibco),  
1052 with 10% FBS (Gemini Bio Products), and 1% antibiotic-antimycotic (Gibco). Both cell lines  
1053 were kept in a humidified atmosphere at 37°C with 5% CO<sub>2</sub>.

1054

1055 Vectors and mutagenesis: All cloning reactions were performed using the In-Fusion cloning  
1056 system (Clontech). Cloning primers are reported in Table S2. Tissue-specific alternative  
1057 splicing generates multiple PAM isoforms [75]. The longest human isoform is a 974 amino  
1058 acid integral membrane protein identified as P19021-5 in UniProt. Since a GenBank search  
1059 revealed that this isoform is more prevalent than the one chosen as the canonical sequence  
1060 (UniProt P19021-1/NM\_001177306.2, 973 amino acid-long), we regarded it as human PAM-  
1061 1, corresponding to what was previously extensively characterized as rat PAM-1, a 976  
1062 amino acid integral membrane protein. The ORF expression clone for wild-type (WT) human  
1063 PAM-1 (NM\_000919.3) cloned into pReceiver-M02 (EX-A3104-M02-GS, Genecopoeia) was  
1064 subcloned into the pCMV-FLAG-C vector (635688, Clontech) using the EcoRI and XhoI  
1065 restriction sites. The resulting PAM-1 protein has an in-frame C-terminal FLAG tag

1066 (DYKDDDDK) separated from its normal C-terminus by a five amino acid spacer (LEVPA). A  
1067 5,373 bp sequence including the human WT *PAM* promoter (5,000 bp) and 5'UTR (373 bp)  
1068 was generated by *de novo* gene synthesis (Blue Heron Biotech) and cloned into the pRMT-  
1069 Luc vector (PR100001, Origene) using the EcoRI and MluI restriction sites located upstream  
1070 of *Firefly* luciferase. The WT and mutant (harboring the c.\*1455C>T variant) 3'UTRs of  
1071 human *PAM* (2,040 bp) were PCR-amplified from human genomic DNA and cloned into  
1072 psiCHECK-2 (Promega) using the XhoI and NotI restriction sites located downstream of  
1073 *Renilla* luciferase. WT and mutant *PAM* sequences consisting of seven different human  
1074 *PAM* exons (exon 2, 6, 16, 18, 19, 20, 21) together with their flanking intronic sequences  
1075 (100/300-bp-long) were PCR-amplified from human genomic DNA and cloned into the  
1076 EcoRI-digested pSPL3 vector (Invitrogen). See Supplemental Methods for more details.

1077

1078 Mutagenic primers (reported in Table S2) were used to introduce *PAM* SNVs using the  
1079 QuikChange II XL site-directed mutagenesis kit (Agilent Technologies). Mutagenesis  
1080 products were verified by Sanger sequencing. Since our findings (see the Results section)  
1081 showed a discrepancy with what was previously reported by *Thomsen et al.* [15] for the  
1082 p.Ser539Trp variant, we prepped the construct harboring this variant twice and sequence-  
1083 verified it again. To introduce the deletion caused by the splice-altering c.2332-2A>T variant  
1084 into the PAM-1\_pCMV-FLAG-C vector, the PCR splicing technique was used. A pair of  
1085 primers flanking the region where the deletion occurs (entire exon 21) and a pair of  
1086 complementary primers comprising a region of -15 bp to +15 bp related to the junction point  
1087 are reported in Table S2.

1088

1089 Antibodies: Antibodies used for the various experiments included the following: an affinity-  
1090 purified rabbit polyclonal antibody (Ab JH629) raised to purified bacterially expressed Exon  
1091 A (exon 16 in rat *Pam*) [76]; a rabbit polyclonal antibody (Ab JH246) raised to a synthetic  
1092 peptide corresponding to human PAM(111-126), which is identical to rat PAM(116-131) [77];

1093 a mouse anti-FLAG monoclonal antibody (F1804, Sigma-Aldrich); and an anti-GM130  
1094 antibody (#610822, BD Biosciences).

1095

1096 Biochemical analysis of nonsynonymous and splice site-affecting SNVs: Transient  
1097 transfection of PAM-1 WT and mutant vectors was performed 24 h after plating using  
1098 PEAKrapid cells and TransIT-2020 (MIR 5400, Mirus Bio) [78]. Cells were harvested 24-36 h  
1099 after transfection. Protein extraction and western blotting were performed as described  
1100 previously [76]. After rinsing with serum-free medium, cells were scraped into serum-free  
1101 medium and pelleted. Cell pellets were extracted into ice cold 20 mM Na TES, 10 mM  
1102 mannitol, 1% TX-100, pH 7.4 (TMT) containing protease inhibitors and subjected to three  
1103 freeze/thaw cycles. Particulate material was removed by centrifugation and protein  
1104 concentrations were determined using the bicinchoninic acid assay with bovine serum  
1105 albumin (BSA) as the standard. For enzyme assays, lysates were diluted using TMT  
1106 containing 1 mg/ml BSA. For Western blot analysis, lysates were denatured using 2X or 4X  
1107 Laemmli Sample Buffer (Bio-Rad).

1108

1109 PHM and PAL assays were performed using [<sup>125</sup>I]-Ac-Tyr-Val-Gly and [<sup>125</sup>I]-Ac-Tyr-Val- $\alpha$ -  
1110 hydroxy-Gly with 0.5  $\mu$ M unlabeled substrate, as described previously [79]. Samples were  
1111 assayed in triplicate, within the linear range of the assay. Data for mutants were normalized  
1112 to data for human PAM-1 analyzed in parallel. Normalized data from multiple different  
1113 transfections were averaged to ensure that each mutant was assessed in at least two  
1114 independent transfections. Human serum samples were diluted 10-fold into 20 mM Na TES,  
1115 10 mM mannitol, 1 mg/ml bovine serum albumin (PHM diluent). Assays for PHM and PAL  
1116 activity were carried out in duplicate or triplicate at pH 5.5; PHM assays included 4  $\mu$ M  
1117 CuSO<sub>4</sub> and PAL assays contained 1 mM CoCl<sub>2</sub>.

1118

1119 Analysis of the glycosylation patterns for PAM WT and mutants was performed as described  
1120 previously [39]. Cells were harvested 24 h after transfection. Cell pellets were frozen and  
1121 thawed in 20 mM Na TES, 10 mM mannitol, pH7.4 containing a protease inhibitor mix.  
1122 Following centrifugation at 17,000 g for 20 min at 4°C, the pellets were extracted in TMT with  
1123 protease inhibitors and the supernatants were denatured using SDS and digested with  
1124 PNGase F or neuraminidase as described by the manufacturer (NEB). For PAM and for  
1125 each PAM variant, one aliquot remained on ice (In, Input) and two aliquots were prepared for  
1126 enzymatic digestion; both were incubated at 37°C for 60 min, but one received enzyme (N-  
1127 Gly or Neur) and one did not (Con). After SDS-PAGE and transfer to PVDF membranes,  
1128 epitope-tagged PAM and its variants were visualized using a FLAG antibody. Neuraminidase  
1129 removes sialic acid from both N-linked and O-linked oligosaccharides. Samples treated with  
1130 neuraminidase were analyzed on two separate gels, with the p.Arg703Gln samples  
1131 appearing in part on both gels.

1132

1133 Analysis of splicing by minigene assay: Transient transfection of WT and mutant pSPL3  
1134 vectors was performed using HEK-293 AD cells and TurboFect (ThermoFisher Scientific).  
1135 Cells were transfected 24 h after plating; 24 h after transfection, total RNA was extracted  
1136 using the RNeasy Plus Mini Kit (Qiagen). RNA (500 ng) was reverse transcribed to cDNA  
1137 using the Superscript III Kit (ThermoFisher Scientific). mRNA synthesis from the plasmids  
1138 using the cells' own transcription and splicing machinery led to mRNA products containing  
1139 the tested *PAM* exon flanked by two exons from the pSPL3 vector. Splicing products were  
1140 analyzed by RT-PCR using the vector-specific SD6 and SA2 primers (Table S2). The empty  
1141 pSPL3 vector was used as negative control.

1142

1143 Analysis of SNVs in regulatory regions by luciferase-based reporters: SNVs located  
1144 upstream (promoter and 5'UTR) and downstream (3'UTR) of *PAM* CDS, were investigated  
1145 using luciferase-based reporter assays transfected into HEK-293 AD cells. The empty  
1146 pRMT-Luc and psiCHECK-2 vectors were used as negative controls. For the 3'UTR

1147 experiments, four microRNA (miRNA) mimics (hsa-miR-138-2-3p, MC12814; hsa-miR-192-  
1148 3p, MC12893; hsa-miR-3143, MC17293; hsa-miR-556-3p, MC12806; all ThermoFisher  
1149 Scientific) were transfected alongside the WT and mutant reporter vectors. Cells were lysed  
1150 24 h after transfection and *Firefly* and/or *Renilla* luciferase activities were measured using  
1151 the Dual-Luciferase Reporter Assay System (Promega) following the manufacturer's  
1152 protocol. When appropriate, ratios of *Firefly/Renilla* luminescence signals, serving as a  
1153 measure for reporter activity normalized for transfection efficiency, were determined using a  
1154 FLUOstar Omega microplate reader (BMG Labtech).

1155

#### 1156 Immunohistochemistry

1157 Immunofluorescence analysis was performed on histological sections from non-pathological  
1158 pituitary cells (control). The full protocol has been detailed elsewhere [80]. Briefly, all slides  
1159 were blocked with 10% normal donkey serum in 1X PBS for 1 h at room temperature and  
1160 then incubated overnight at 4°C with affinity-purified 1:500 anti-PAM JH629 and anti-GM130.  
1161 All slides were incubated for 1 h with 1:500 donkey anti-rabbit 488 and donkey anti-mouse  
1162 594 (respectively, A-11055 and A-21207, ThermoFisher Scientific). Slides were imaged at  
1163 40x on a Keyence BZ- X710 microscope.

1164

#### 1165 Statistical analysis

1166 All graphs were plotted as mean  $\pm$  standard error of the mean (SEM). Data distributions  
1167 were assessed for approximate normality. Differences between experimental groups were  
1168 analyzed by two-tailed Student's t-test or 1-way ANOVA with Dunnett's *post hoc* test, or  
1169 corresponding non-parametric tests, as appropriate. *PAM* SNV allele frequencies in the  
1170 study population were compared with frequencies in the general population reported in the  
1171 gnomAD public database using Fisher's exact test or the chi-square test, as appropriate.  
1172 Data were analyzed using GraphPad Prism (GraphPad, San Diego, CA, USA). p-values <  
1173 0.05 were considered statistically significant.

1174



## 1175 **Acknowledgments**

1176 The authors would like to thank Steven Coon of the Molecular Genomics Core of  
1177 NICHD/NIH for conducting the phasing experiment, the late Mario Amzel (Johns Hopkins  
1178 University School of Medicine) for useful comments on the impact of *PAM* variants on its 3D  
1179 structure, Lyssikatos Charalampos and María de la Luz Sierra (NICHD/NIH) for their help  
1180 with the collection and preparation of DNA and histopathological samples used in this study;  
1181 Emilie Castermans and Leonor Palmeira (CHU de Liège) for genetic and bioinformatic  
1182 analyses of FIPA kindreds, and Jean-Francois Bonneville (CHU de Liège, Belgium) for  
1183 discussions on the neuroradiological images.

1184

## 1185 **Data and Code Availability**

1186 The code used to conduct the spatial clustering analysis can be found at  
1187 [https://github.com/NICHD-BSPC/spatial\\_clustering](https://github.com/NICHD-BSPC/spatial_clustering).

1188

## 1189 **Web Resources**

1190 BWA, <https://github.com/lh3/bwa>

1191 CADD, <https://cadd.gs.washington.edu/>

1192 ClinVar, <https://www.ncbi.nlm.nih.gov/clinvar/>

1193 Clustal Omega, <https://www.ebi.ac.uk/Tools/msa/clustalo/>

1194 dbNSFP (ver. 4.3a), <http://database.liulab.science/dbNSFP>

1195 dbSNP, <https://www.ncbi.nlm.nih.gov/snp/>

1196 Ensembl VEP (ver. 102), <https://grch37.ensembl.org/info/docs/tools/vep/index.html>

1197 GATK (ver. 4.2.3.0), <https://gatk.broadinstitute.org/hc/en-us/articles/4409678362139-GATK->

1198 [4-2-3-0-release](#)

1199 Genomatix, <https://www.genomatix.de/>

1200 gnomAD (ver. 3.1.2), <https://gnomad.broadinstitute.org/>

1201 Gene Structure Display Server (GSDS 2.0), <http://gsds.cbi.pku.edu.cn/>

1202 GTEx Project, <https://www.gtexportal.org/home/>



- 1203 HIPred score, <https://github.com/HAShahab/HIPred>
- 1204 HTSJDK (ver. 2.24.1), <https://samtools.github.io/htsjdk/>
- 1205 OMIM, <https://www.ncbi.nlm.nih.gov/omim>
- 1206 PCR splicing technique, [http://www.methods.info/Methods/Mutagenesis/PCR\\_splicing.html](http://www.methods.info/Methods/Mutagenesis/PCR_splicing.html)
- 1207 Picard (ver. 2.25.4), <http://broadinstitute.github.io/picard/>
- 1208 PolyPhen-2, <http://genetics.bwh.harvard.edu/pph2/>
- 1209 Primer3, <https://www.ncbi.nlm.nih.gov/omim>
- 1210 Protein Molecular Weight, [https://www.bioinformatics.org/sms/prot\\_mw.html](https://www.bioinformatics.org/sms/prot_mw.html)
- 1211 Slivar, <https://github.com/brentp/slivar>
- 1212 The Gene Damage Index (GDI) Server, <http://pec630.rockefeller.edu:8080/GDI/>
- 1213 The Human Protein Atlas, <https://www.proteinatlas.org/>
- 1214 UniProt, <https://www.uniprot.org/>
- 1215 Varsome, <https://varsome.com/>

1216

### 1217 **Declaration of Interests**

1218 Dr. Beckers, Dr. Daly, Dr. Faucz, Dr. Stratakis and Dr. Trivellin hold a patent on the *GPR101*

1219 gene and its function (US Patent No. 10,350,273, Treatment of Hormonal Disorders of

1220 Growth). Dr. Stratakis holds patents on technologies involving *PRKAR1A* and related genes

1221 causing adrenal, pituitary, and other tumors. In addition, his laboratory has received

1222 research funding support by Pfizer Inc. for investigations on growth-hormone producing

1223 pituitary adenomas. Dr. Stratakis also has consulted within the last 12 months with

1224 Lundbeck Pharmaceuticals and Sync, LLC, and is currently employed by ELPEN

1225 Pharmaceuticals. Dr. Beckers and Dr. Daly have received research funding from Pfizer Inc.

1226 and Novo-Nordisk. Dr. Jaffrain-Rea is part of the advisory board of Recordati Rare diseases

1227 since 2022. The authors declare that they have no conflicts of interest with the contents of

1228 this article.

1229

### 1230 **Funding**

1231 The work was supported by the following funding sources: Society for Endocrinology  
1232 equipment grant (to GT); Intramural Research Program, *Eunice Kennedy Shriver* National  
1233 Institute of Child Health and Human Development (NICHD) and National Institute of  
1234 Neurological Disorders and Stroke (NINDS), National Institutes of Health (NIH) Research  
1235 projects Z1A HD008920 (to CAS, supporting GT, LCHR, FRF), R01-DK032949 (to BAE and  
1236 REM); the Intramural Research Program of the National Human Genome Research Institute  
1237 (to CT and WAG); the Daniel Schwartzberg Fund (to REM and BAE); Fonds  
1238 d'Investissement pour la Recherche Scientifique (FIRS) of the Centre Hospitalier  
1239 Universitaire de Liège (to AFD and AB); Novo Nordisk Belgium Educational Grant, Belgium  
1240 (to AFD and AB); the JABBS Foundation, UK (to AB). AFD was supported, in part, by Action  
1241 de Recherche Concertée (ARC) Grant 17/21-01 from Liège University.

## References

- 1242  
1243
- 1244 1. Figarella-Branger D, Appay R, Metais A, Tauziède-Espariat A, Colin C, Rousseau A, et  
1245 al. [The 2021 WHO classification of tumours of the central nervous system]. *Ann Pathol*. 2021.  
1246 Epub 20211202. doi: 10.1016/j.annpat.2021.11.005. PubMed PMID: 34865882.
- 1247 2. Melmed S, Kaiser UB, Lopes MB, Bertherat J, Syro LV, Raverot G, et al. Clinical Biology  
1248 of the Pituitary Adenoma. *Endocr Rev*. 2022. Epub 20220408. doi: 10.1210/endrev/bnac010.  
1249 PubMed PMID: 35395078.
- 1250 3. Daly AF, Rixhon M, Adam C, Dempegioti A, Tichomirowa MA, Beckers A. High  
1251 prevalence of pituitary adenomas: a cross-sectional study in the province of Liege, Belgium. *J*  
1252 *Clin Endocrinol Metab*. 2006;91(12):4769-75. Epub 20060912. doi: 10.1210/jc.2006-1668.  
1253 PubMed PMID: 16968795.
- 1254 4. Srirangam Nadhamuni V, Korbonits M. Novel Insights into Pituitary Tumorigenesis:  
1255 Genetic and Epigenetic Mechanisms. *Endocr Rev*. 2020;41(6). Epub 2020/03/24. doi:  
1256 10.1210/endrev/bnaa006. PubMed PMID: 32201880; PubMed Central PMCID:  
1257 PMCPMC7441741.
- 1258 5. Vandeva S, Daly AF, Petrossians P, Zacharieva S, Beckers A. Somatic and germline  
1259 mutations in the pathogenesis of pituitary adenomas. *Eur J Endocrinol*. 2019;181(6):R235-R54.  
1260 Epub 2019/10/29. doi: 10.1530/EJE-19-0602. PubMed PMID: 31658440.
- 1261 6. Beckers A, Aaltonen LA, Daly AF, Karhu A. Familial isolated pituitary adenomas (FIPA)  
1262 and the pituitary adenoma predisposition due to mutations in the aryl hydrocarbon receptor  
1263 interacting protein (AIP) gene. *Endocr Rev*. 2013;34(2):239-77. Epub 20130131. doi:  
1264 10.1210/er.2012-1013. PubMed PMID: 23371967; PubMed Central PMCID: PMCPMC3610678.
- 1265 7. Trivellin G, Daly AF, Faucz FR, Yuan B, Rostomyan L, Larco DO, et al. Gigantism and  
1266 acromegaly due to Xq26 microduplications and GPR101 mutation. *N Engl J Med*.  
1267 2014;371(25):2363-74. Epub 20141203. doi: 10.1056/NEJMoa1408028. PubMed PMID:  
1268 25470569; PubMed Central PMCID: PMCPMC4291174.
- 1269 8. Coopmans EC, Korbonits M. Molecular genetic testing in the management of pituitary  
1270 disease. *Clin Endocrinol (Oxf)*. 2022;97(4):424-35. Epub 20220329. doi: 10.1111/cen.14706.  
1271 PubMed PMID: 35349723.
- 1272 9. Back N, Mains RE, Eipper BA. PAM: diverse roles in neuroendocrine cells,  
1273 cardiomyocytes, and green algae. *FEBS J*. 2022;289(15):4470-96. Epub 20210622. doi:  
1274 10.1111/febs.16049. PubMed PMID: 34089560.
- 1275 10. Kumar D, Mains RE, Eipper BA. 60 YEARS OF POMC: From POMC and alpha-MSH to  
1276 PAM, molecular oxygen, copper, and vitamin C. *J Mol Endocrinol*. 2016;56(4):T63-76. Epub  
1277 20151214. doi: 10.1530/JME-15-0266. PubMed PMID: 26667899; PubMed Central PMCID:  
1278 PMCPMC4899100.
- 1279 11. Mains RE, Blaby-Haas C, Rheaume BA, Eipper BA. Changes in Corticotrope Gene  
1280 Expression Upon Increased Expression of Peptidylglycine alpha-Amidating Monooxygenase.  
1281 *Endocrinology*. 2018;159(7):2621-39. Epub 2018/05/23. doi: 10.1210/en.2018-00235. PubMed  
1282 PMID: 29788427; PubMed Central PMCID: PMCPMC6287594.

- 1283 12. Faucz FR, Tirosh A, Tatsi C, Berthon A, Hernandez-Ramirez LC, Settas N, et al.  
1284 Somatic USP8 Gene Mutations Are a Common Cause of Pediatric Cushing Disease. *J Clin*  
1285 *Endocrinol Metab.* 2017;102(8):2836-43. Epub 2017/05/16. doi: 10.1210/jc.2017-00161.  
1286 PubMed PMID: 28505279; PubMed Central PMCID: PMC5546857.
- 1287 13. Chufan EE, De M, Eipper BA, Mains RE, Amzel LM. Amidation of bioactive peptides: the  
1288 structure of the lyase domain of the amidating enzyme. *Structure.* 2009;17(7):965-73. Epub  
1289 2009/07/17. doi: 10.1016/j.str.2009.05.008. PubMed PMID: 19604476; PubMed Central PMCID:  
1290 PMC2993158.
- 1291 14. Hu B, Jin J, Guo A-Y, Zhang H, Luo J, Gao G. GSDS 2.0: an upgraded gene feature  
1292 visualization server. *Bioinformatics.* 2015;31(8):1296-7. Epub 2014/12/10. doi:  
1293 10.1093/bioinformatics/btu817. PubMed PMID: 25504850; PubMed Central PMCID:  
1294 PMC4393523.
- 1295 15. Thomsen SK, Raimondo A, Hastoy B, Sengupta S, Dai XQ, Bautista A, et al. Type 2  
1296 diabetes risk alleles in PAM impact insulin release from human pancreatic beta-cells. *Nat*  
1297 *Genet.* 2018;50(8):1122-31. Epub 2018/07/27. doi: 10.1038/s41588-018-0173-1. PubMed PMID:  
1298 30054598; PubMed Central PMCID: PMC6237273.
- 1299 16. Braas KM, Stoffers DA, Eipper BA, May V. Tissue specific expression of rat  
1300 peptidylglycine alpha-amidating monooxygenase activity and mRNA. *Mol Endocrinol.*  
1301 1989;3(9):1387-98. Epub 1989/09/01. doi: 10.1210/mend-3-9-1387. PubMed PMID: 2575217.
- 1302 17. Ferraro F, Eipper BA, Mains RE. Retrieval and reuse of pituitary secretory granule  
1303 proteins. *J Biol Chem.* 2005;280(27):25424-35. Epub 2005/05/19. doi: 10.1074/jbc.M414156200.  
1304 PubMed PMID: 15905171.
- 1305 18. May V, Cullen EI, Braas KM, Eipper BA. Membrane-associated forms of peptidylglycine  
1306 alpha-amidating monooxygenase activity in rat pituitary. Tissue specificity. *J Biol Chem.*  
1307 1988;263(16):7550-4. Epub 1988/06/05. PubMed PMID: 3372499.
- 1308 19. Gaier ED, Kleppinger A, Ralle M, Covault J, Mains RE, Kenny AM, et al. Genetic  
1309 determinants of amidating enzyme activity and its relationship with metal cofactors in human  
1310 serum. *BMC Endocr Disord.* 2014;14:58. Epub 2014/07/15. doi: 10.1186/1472-6823-14-58.  
1311 PubMed PMID: 25022877; PubMed Central PMCID: PMC4113131.
- 1312 20. Kaufmann P, Bergmann A, Melander O. Novel insights into peptide amidation and  
1313 amidating activity in the human circulation. *Scientific Reports.* 2021;11(1):15791. Epub  
1314 2021/08/04. doi: 10.1038/s41598-021-95305-y. PubMed PMID: 34349173; PubMed Central  
1315 PMCID: PMC8338962.
- 1316 21. Knudson AG. Antioncogenes and human cancer. *Proceedings of the National Academy*  
1317 *of Sciences.* 1993;90(23):10914-21. Epub 1993/12/01. doi: 10.1073/pnas.90.23.10914. PubMed  
1318 PMID: 7902574; PubMed Central PMCID: PMC47892.
- 1319 22. Hirschhorn R. In vivo reversion to normal of inherited mutations in humans. *Journal of*  
1320 *Medical Genetics.* 2003;40(10):721-8. Epub 2003/10/22. doi: 10.1136/jmg.40.10.721. PubMed  
1321 PMID: 14569115; PubMed Central PMCID: PMC1735296.

- 1322 23. Wu MC, Lee S, Cai T, Li Y, Boehnke M, Lin X. Rare-variant association testing for  
1323 sequencing data with the sequence kernel association test. *Am J Hum Genet.* 2011;89(1):82-  
1324 93. Epub 20110707. doi: 10.1016/j.ajhg.2011.05.029. PubMed PMID: 21737059; PubMed  
1325 Central PMCID: PMCPMC3135811.
- 1326 24. Ionita-Laza I, Lee S, Makarov V, Buxbaum Joseph D, Lin X. Sequence Kernel  
1327 Association Tests for the Combined Effect of Rare and Common Variants. *The American*  
1328 *Journal of Human Genetics.* 2013;92(6):841-53. Epub 20130516. doi:  
1329 10.1016/j.ajhg.2013.04.015. PubMed PMID: 23684009; PubMed Central PMCID:  
1330 PMCPMC3675243.
- 1331 25. Bell-Parikh LC, Eipper BA, Mains RE. Response of an integral granule membrane  
1332 protein to changes in pH. *J Biol Chem.* 2001;276(32):29854-63. Epub 20010606. doi:  
1333 10.1074/jbc.M103936200. PubMed PMID: 11395514.
- 1334 26. Itan Y, Shang L, Boisson B, Patin E, Bolze A, Moncada-Vélez M, et al. The human gene  
1335 damage index as a gene-level approach to prioritizing exome variants. *Proceedings of the*  
1336 *National Academy of Sciences.* 2015;112(44):13615-20. Epub 20151019. doi:  
1337 10.1073/pnas.1518646112. PubMed PMID: 26483451; PubMed Central PMCID:  
1338 PMCPMC4640721.
- 1339 27. Alyousfi D, Baralle D, Collins A. Gene-specific metrics to facilitate identification of  
1340 disease genes for molecular diagnosis in patient genomes: a systematic review. *Brief Funct*  
1341 *Genomics.* 2019;18(1):23-9. Epub 2018/10/13. doi: 10.1093/bfgp/ely033. PubMed PMID:  
1342 30312370.
- 1343 28. Eipper BA, Park LP, Dickerson IM, Keutmann HT, Thiele EA, Rodriguez H, et al.  
1344 Structure of the precursor to an enzyme mediating COOH-terminal amidation in peptide  
1345 biosynthesis. *Mol Endocrinol.* 1987;1(11):777-90. Epub 1987/11/01. doi: 10.1210/mend-1-11-  
1346 777. PubMed PMID: 3153462.
- 1347 29. Stoffers DA, Green CB, Eipper BA. Alternative mRNA splicing generates multiple forms  
1348 of peptidyl-glycine alpha-amidating monooxygenase in rat atrium. *Proc Natl Acad Sci U S A.*  
1349 1989;86(2):735-9. Epub 1989/01/01. doi: 10.1073/pnas.86.2.735. PubMed PMID: 2911604;  
1350 PubMed Central PMCID: PMCPMC286549.
- 1351 30. Ciccotosto GD, Hand TA, Mains RE, Eipper BA. Breeding stock-specific variation in  
1352 peptidylglycine alpha-amidating monooxygenase messenger ribonucleic acid splicing in rat  
1353 pituitary. *Endocrinology.* 2000;141(2):476-86. doi: 10.1210/endo.141.2.7337. PubMed PMID:  
1354 10650926.
- 1355 31. Brue T, Camper SA. Novel mechanism of pituitary hormone deficiency: genetic variants  
1356 shift splicing to produce a dominant negative transcription factor isoform. *Eur J Endocrinol.*  
1357 2021;185(6):C19-C25. Epub 20211126. doi: 10.1530/EJE-21-0949. PubMed PMID: 34597272.
- 1358 32. Vazquez-Borrego MC, Fuentes-Fayos AC, Venegas-Moreno E, Rivero-Cortes E, Dios E,  
1359 Moreno-Moreno P, et al. Splicing Machinery is Dysregulated in Pituitary Neuroendocrine  
1360 Tumors and is Associated with Aggressiveness Features. *Cancers (Basel).* 2019;11(10). Epub  
1361 20190926. doi: 10.3390/cancers11101439. PubMed PMID: 31561558; PubMed Central PMCID:  
1362 PMCPMC6826715.

- 1363 33. Franke M, Daly AF, Palmeira L, Tirosh A, Stigliano A, Trifan E, et al. Duplications disrupt  
1364 chromatin architecture and rewire GPR101-enhancer communication in X-linked acrogigantism.  
1365 Am J Hum Genet. 2022;109(4):553-70. Epub 20220223. doi: 10.1016/j.ajhg.2022.02.002.  
1366 PubMed PMID: 35202564; PubMed Central PMCID: PMCPMC9069129.
- 1367 34. Rostomyan L, Daly AF, Petrossians P, Nachev E, Lila AR, Lecoq AL, et al. Clinical and  
1368 genetic characterization of pituitary gigantism: an international collaborative study in 208  
1369 patients. Endocr Relat Cancer. 2015;22(5):745-57. Epub 20150717. doi: 10.1530/ERC-15-0320.  
1370 PubMed PMID: 26187128; PubMed Central PMCID: PMCPMC6533620.
- 1371 35. Ciccotosto GD, Schiller MR, Eipper BA, Mains RE. Induction of integral membrane PAM  
1372 expression in AtT-20 cells alters the storage and trafficking of POMC and PC1. J Cell Biol.  
1373 1999;144(3):459-71. Epub 1999/02/11. doi: 10.1083/jcb.144.3.459. PubMed PMID: 9971741;  
1374 PubMed Central PMCID: PMCPMC2132922.
- 1375 36. El Meskini R, Mains RE, Eipper BA. Cell type-specific metabolism of peptidylglycine  
1376 alpha-amidating monooxygenase in anterior pituitary. Endocrinology. 2000;141(8):3020-34.  
1377 Epub 2000/08/05. doi: 10.1210/endo.141.8.7620. PubMed PMID: 10919291.
- 1378 37. Fuchsberger C, Flannick J, Teslovich TM, Mahajan A, Agarwala V, Gaulton KJ, et al.  
1379 The genetic architecture of type 2 diabetes. Nature. 2016;536(7614):41-7. Epub 20160711. doi:  
1380 10.1038/nature18642. PubMed PMID: 27398621; PubMed Central PMCID: PMCPMC5034897.
- 1381 38. Steinthorsdottir V, Thorleifsson G, Sulem P, Helgason H, Grarup N, Sigurdsson A, et al.  
1382 Identification of low-frequency and rare sequence variants associated with elevated or reduced  
1383 risk of type 2 diabetes. Nat Genet. 2014;46(3):294-8. Epub 20140126. doi: 10.1038/ng.2882.  
1384 PubMed PMID: 24464100.
- 1385 39. Kolhekar AS, Quon AS, Berard CA, Mains RE, Eipper BA. Post-translational N-  
1386 glycosylation of a truncated form of a peptide processing enzyme. J Biol Chem.  
1387 1998;273(36):23012-8. Epub 1998/08/29. doi: 10.1074/jbc.273.36.23012. PubMed PMID:  
1388 9722525.
- 1389 40. Shihab HA, Rogers MF, Campbell C, Gaunt TR. HIPred: an integrative approach to  
1390 predicting haploinsufficient genes. Bioinformatics. 2017;33(12):1751-7. Epub 2017/02/01. doi:  
1391 10.1093/bioinformatics/btx028. PubMed PMID: 28137713; PubMed Central PMCID:  
1392 PMCPMC5581952.
- 1393 41. Schierup MH, Huang N, Lee I, Marcotte EM, Hurler ME. Characterising and Predicting  
1394 Haploinsufficiency in the Human Genome. PLoS Genetics. 2010;6(10):e1001154. Epub  
1395 20101014. doi: 10.1371/journal.pgen.1001154. PubMed PMID: 20976243; PubMed Central  
1396 PMCID: PMCPMC2954820.
- 1397 42. Czyzyk TA, Ning Y, Hsu MS, Peng B, Mains RE, Eipper BA, et al. Deletion of peptide  
1398 amidation enzymatic activity leads to edema and embryonic lethality in the mouse. Dev Biol.  
1399 2005;287(2):301-13. Epub 20051012. doi: 10.1016/j.ydbio.2005.09.001. PubMed PMID:  
1400 16225857.
- 1401 43. Bousquet-Moore D, Ma XM, Nillni EA, Czyzyk TA, Pintar JE, Eipper BA, et al. Reversal  
1402 of physiological deficits caused by diminished levels of peptidylglycine alpha-amidating  
1403 monooxygenase by dietary copper. Endocrinology. 2009;150(4):1739-47. Epub 20081120. doi:



- 1404 10.1210/en.2008-1202. PubMed PMID: 19022883; PubMed Central PMCID:  
1405 PMCPMC2659272.
- 1406 44. Gaier ED, Rodriguiz RM, Ma XM, Sivaramakrishnan S, Bousquet-Moore D, Wetsel WC,  
1407 et al. Haploinsufficiency in peptidylglycine alpha-amidating monooxygenase leads to altered  
1408 synaptic transmission in the amygdala and impaired emotional responses. *J Neurosci.*  
1409 2010;30(41):13656-69. Epub 2010/10/15. doi: 10.1523/JNEUROSCI.2200-10.2010. PubMed  
1410 PMID: 20943906; PubMed Central PMCID: PMCPMC2975325.
- 1411 45. Bousquet-Moore D, Prohaska JR, Nillni EA, Czyzyk T, Wetsel WC, Mains RE, et al.  
1412 Interactions of peptide amidation and copper: novel biomarkers and mechanisms of neural  
1413 dysfunction. *Neurobiol Dis.* 2010;37(1):130-40. Epub 20091006. doi:  
1414 10.1016/j.nbd.2009.09.016. PubMed PMID: 19815072; PubMed Central PMCID:  
1415 PMCPMC2787818.
- 1416 46. Yin P, Bousquet-Moore D, Annangudi SP, Southey BR, Mains RE, Eipper BA, et al.  
1417 Probing the production of amidated peptides following genetic and dietary copper  
1418 manipulations. *PLoS One.* 2011;6(12):e28679. Epub 20111216. doi:  
1419 10.1371/journal.pone.0028679. PubMed PMID: 22194882; PubMed Central PMCID:  
1420 PMCPMC3241674.
- 1421 47. Rajagopal C, Mains RE, Eipper BA. Signaling from the secretory granule to the nucleus.  
1422 *Crit Rev Biochem Mol Biol.* 2012;47(4):391-406. Epub 20120608. doi:  
1423 10.3109/10409238.2012.694845. PubMed PMID: 22681236; PubMed Central PMCID:  
1424 PMCPMC3920730.
- 1425 48. Francone VP, Ifrim MF, Rajagopal C, Leddy CJ, Wang Y, Carson JH, et al. Signaling  
1426 from the secretory granule to the nucleus: Uhmk1 and PAM. *Mol Endocrinol.* 2010;24(8):1543-  
1427 58. Epub 20100623. doi: 10.1210/me.2009-0381. PubMed PMID: 20573687; PubMed Central  
1428 PMCID: PMCPMC2940467.
- 1429 49. Eipper BA, Stoffers DA, Mains RE. The biosynthesis of neuropeptides: peptide alpha-  
1430 amidation. *Annu Rev Neurosci.* 1992;15:57-85. Epub 1992/01/01. doi:  
1431 10.1146/annurev.ne.15.030192.000421. PubMed PMID: 1575450.
- 1432 50. Vishwanatha K, Back N, Mains RE, Eipper BA. A histidine-rich linker region in  
1433 peptidylglycine alpha-amidating monooxygenase has the properties of a pH sensor. *J Biol*  
1434 *Chem.* 2014;289(18):12404-20. Epub 20140313. doi: 10.1074/jbc.M113.545947. PubMed  
1435 PMID: 24627494; PubMed Central PMCID: PMCPMC4007436.
- 1436 51. Back N, Luxmi R, Powers KG, Mains RE, Eipper BA. Peptidylglycine alpha-amidating  
1437 monooxygenase is required for atrial secretory granule formation. *Proc Natl Acad Sci U S A.*  
1438 2020;117(30):17820-31. Epub 20200713. doi: 10.1073/pnas.2004410117. PubMed PMID:  
1439 32661174; PubMed Central PMCID: PMCPMC7395455.
- 1440 52. Bartels ED, Gotze JP, Mains RE, Eipper BA. Commentary on: Peptidylglycine alpha-  
1441 amidating Monooxygenase is Required for Atrial Secretory Granule Formation. *J Clin Cardiol.*  
1442 2021;2(4):75-80. doi: 10.33696/cardiology.2.022. PubMed PMID: 35098246; PubMed Central  
1443 PMCID: PMCPMC8793981.

- 1444 53. Gahl WA, Markello TC, Toro C, Fajardo KF, Sincan M, Gill F, et al. The National  
1445 Institutes of Health Undiagnosed Diseases Program: insights into rare diseases. *Genet Med.*  
1446 2012;14(1):51-9. Epub 20110926. doi: 10.1038/gim.0b013e318232a005. PubMed PMID:  
1447 22237431; PubMed Central PMCID: PMCPMC4098846.
- 1448 54. Gahl WA, Mulvihill JJ, Toro C, Markello TC, Wise AL, Ramoni RB, et al. The NIH  
1449 Undiagnosed Diseases Program and Network: Applications to modern medicine. *Mol Genet*  
1450 *Metab.* 2016;117(4):393-400. Epub 20160122. doi: 10.1016/j.ymgme.2016.01.007. PubMed  
1451 PMID: 26846157; PubMed Central PMCID: PMCPMC5560125.
- 1452 55. Gahl WA, Tifft CJ. The NIH Undiagnosed Diseases Program: lessons learned. *JAMA.*  
1453 2011;305(18):1904-5. doi: 10.1001/jama.2011.613. PubMed PMID: 21558523.
- 1454 56. Hernandez-Ramirez LC, Gam R, Valdes N, Lodish MB, Pankratz N, Balsalobre A, et al.  
1455 Loss-of-function mutations in the CABLES1 gene are a novel cause of Cushing's disease.  
1456 *Endocr Relat Cancer.* 2017;24(8):379-92. Epub 20170522. doi: 10.1530/ERC-17-0131. PubMed  
1457 PMID: 28533356; PubMed Central PMCID: PMCPMC5510591.
- 1458 57. Lecoq AL, Bouligand J, Hage M, Cazabat L, Salenave S, Linglart A, et al. Very low  
1459 frequency of germline GPR101 genetic variation and no biallelic defects with AIP in a large  
1460 cohort of patients with sporadic pituitary adenomas. *Eur J Endocrinol.* 2016;174(4):523-30.  
1461 Epub 20160120. doi: 10.1530/EJE-15-1044. PubMed PMID: 26792934.
- 1462 58. Li H. Aligning sequence reads, clone sequences and assembly contigs with BWA-MEM.  
1463 2013. doi: 10.48550/arxiv.1303.3997.
- 1464 59. van der Auwera G, O'Connor BD. *Genomics in the Cloud: Using Docker, GATK, and*  
1465 *WDL in Terra*: O'Reilly Media, Incorporated; 2020.
- 1466 60. McLaren W, Gil L, Hunt SE, Riat HS, Ritchie GR, Thormann A, et al. The Ensembl  
1467 Variant Effect Predictor. *Genome Biol.* 2016;17(1):122. Epub 20160606. doi: 10.1186/s13059-  
1468 016-0974-4. PubMed PMID: 27268795; PubMed Central PMCID: PMCPMC4893825.
- 1469 61. Liu X, Li C, Mou C, Dong Y, Tu Y. dbNSFP v4: a comprehensive database of transcript-  
1470 specific functional predictions and annotations for human nonsynonymous and splice-site SNVs.  
1471 *Genome Med.* 2020;12(1):103. Epub 20201202. doi: 10.1186/s13073-020-00803-9. PubMed  
1472 PMID: 33261662; PubMed Central PMCID: PMCPMC7709417.
- 1473 62. Pedersen BS, Brown JM, Dashnow H, Wallace AD, Velinder M, Tristani-Firouzi M, et al.  
1474 Effective variant filtering and expected candidate variant yield in studies of rare human disease.  
1475 *NPJ Genom Med.* 2021;6(1):60. Epub 20210715. doi: 10.1038/s41525-021-00227-3. PubMed  
1476 PMID: 34267211; PubMed Central PMCID: PMCPMC8282602.
- 1477 63. Robinson JT, Thorvaldsdottir H, Winckler W, Guttman M, Lander ES, Getz G, et al.  
1478 Integrative genomics viewer. *Nat Biotechnol.* 2011;29(1):24-6. Epub 2011/01/12. doi:  
1479 10.1038/nbt.1754. PubMed PMID: 21221095; PubMed Central PMCID: PMCPMC3346182.
- 1480 64. Fletcher PA, Smiljanic K, Maso Previde R, Iben JR, Li T, Rokic MB, et al. Cell Type- and  
1481 Sex-Dependent Transcriptome Profiles of Rat Anterior Pituitary Cells. *Front Endocrinol*  
1482 *(Lausanne).* 2019;10:623. Epub 20190918. doi: 10.3389/fendo.2019.00623. PubMed PMID:  
1483 31620083; PubMed Central PMCID: PMCPMC6760010.



- 1484 65. van der Maaten L, Hinton G. Visualizing High-Dimensional Data Using t-SNE. *Journal of*  
1485 *Machine Learning Research*. 2008;9:2579-605.
- 1486 66. Eipper BA, Quon AS, Mains RE, Boswell JS, Blackburn NJ. The catalytic core of  
1487 peptidylglycine alpha-hydroxylating monooxygenase: investigation by site-directed mutagenesis,  
1488 Cu X-ray absorption spectroscopy, and electron paramagnetic resonance. *Biochemistry*.  
1489 1995;34(9):2857-65. Epub 1995/03/07. doi: 10.1021/bi00009a016. PubMed PMID: 7893699.
- 1490 67. Fan X, Spijker S, Akalal DB, Nagle GT. Neuropeptide amidation: cloning of a bifunctional  
1491 alpha-amidating enzyme from *Aplysia*. *Brain Res Mol Brain Res*. 2000;82(1-2):25-34. Epub  
1492 2000/10/24. doi: 10.1016/s0169-328x(00)00173-x. PubMed PMID: 11042355.
- 1493 68. Han M, Park D, Vanderzalm PJ, Mains RE, Eipper BA, Taghert PH. *Drosophila* uses two  
1494 distinct neuropeptide amidating enzymes, dPAL1 and dPAL2. *J Neurochem*. 2004;90(1):129-41.  
1495 Epub 2004/06/17. doi: 10.1111/j.1471-4159.2004.02464.x. PubMed PMID: 15198673.
- 1496 69. Kolhekar AS, Keutmann HT, Mains RE, Quon ASW, Eipper BA. Peptidyl alpha-hydroxylating  
1497 monooxygenase: active site residues, disulfide linkages and a two-domain model of the catalytic  
1498 core. *Biochemistry*. 1997;36:10901-9.
- 1499 70. Kumar D, Blaby-Haas CE, Merchant SS, Mains RE, King SM, Eipper BA. Early  
1500 eukaryotic origins for cilia-associated bioactive peptide-amidating activity. *J Cell Sci*.  
1501 2016;129(5):943-56. Epub 2016/01/19. doi: 10.1242/jcs.177410. PubMed PMID: 26787743;  
1502 PubMed Central PMCID: PMC4813317.
- 1503 71. Luxmi R, Kumar D, Mains RE, King SM, Eipper BA. Cilia-based peptidergic signaling.  
1504 *PLoS Biol*. 2019;17(12):e3000566. Epub 2019/12/06. doi: 10.1371/journal.pbio.3000566.  
1505 PubMed PMID: 31809498; PubMed Central PMCID: PMC6919629.
- 1506 72. Prigge ST, Kolhekar AS, Eipper BA, Mains RE, Amzel LM. Amidation of bioactive  
1507 peptides: the structure of peptidylglycine alpha-hydroxylating monooxygenase. *Science*.  
1508 1997;278(5341):1300-5. Epub 1997/11/21. doi: 10.1126/science.278.5341.1300. PubMed  
1509 PMID: 9360928.
- 1510 73. Bycroft C, Freeman C, Petkova D, Band G, Elliott LT, Sharp K, et al. The UK Biobank  
1511 resource with deep phenotyping and genomic data. *Nature*. 2018;562(7726):203-9. Epub  
1512 2018/10/10. doi: 10.1038/s41586-018-0579-z. PubMed PMID: 30305743; PubMed Central  
1513 PMCID: PMC6786975.
- 1514 74. Curtis D, Bakaya K, Sharma L, Bandyopadhyay S. Weighted burden analysis of exome-  
1515 sequenced late-onset Alzheimer's cases and controls provides further evidence for a role for  
1516 PSEN1 and suggests involvement of the PI3K/Akt/GSK-3beta and WNT signalling pathways.  
1517 *Ann Hum Genet*. 2020;84(3):291-302. Epub 2020/02/05. doi: 10.1111/ahg.12375. PubMed PMID:  
1518 32020597.
- 1519 75. Bousquet-Moore D, Mains RE, Eipper BA. Peptidylglycine alpha-amidating  
1520 monooxygenase and copper: a gene-nutrient interaction critical to nervous system function. *J*  
1521 *Neurosci Res*. 2010;88(12):2535-45. Epub 2010/07/22. doi: 10.1002/jnr.22404. PubMed PMID:  
1522 20648645; PubMed Central PMCID: PMC3732055.

- 1523 76. Powers KG, Ma XM, Eipper BA, Mains RE. Identifying roles for peptidergic signaling in  
1524 mice. *Proc Natl Acad Sci U S A*. 2019;116(40):20169-79. Epub 20190827. doi:  
1525 10.1073/pnas.1910495116. PubMed PMID: 31455734; PubMed Central PMCID:  
1526 PMCPMC6778246.
- 1527 77. Husten EJ, Eipper BA. The membrane-bound bifunctional peptidylglycine alpha-  
1528 amidating monooxygenase protein. Exploration of its domain structure through limited  
1529 proteolysis. *J Biol Chem*. 1991;266:17004-10.
- 1530 78. Katrancha SM, Wu Y, Zhu M, Eipper BA, Koleske AJ, Mains RE. Neurodevelopmental  
1531 disease-associated de novo mutations and rare sequence variants affect TRIO GDP/GTP  
1532 exchange factor activity. *Human Molecular Genetics*. 2017;26(23):4728-40. doi:  
1533 10.1093/hmg/ddx355. PubMed PMID: 28973398; PubMed Central PMCID: PMCPMC5886096.
- 1534 79. Kolhekar AS, Mains RE, Eipper BA. Peptidylglycine alpha-amidating monooxygenase:  
1535 an ascorbate-requiring enzyme. *Methods Enzymol*. 1997;279:35-43. doi: 10.1016/s0076-  
1536 6879(97)79007-4. PubMed PMID: 9211255.
- 1537 80. Trivellin G, Bjelobaba I, Daly AF, Larco DO, Palmeira L, Faucz FR, et al.  
1538 Characterization of GPR101 transcript structure and expression patterns. *J Mol Endocrinol*.  
1539 2016;57(2):97-111. Epub 20160609. doi: 10.1530/JME-16-0045. PubMed PMID: 27282544;  
1540 PubMed Central PMCID: PMCPMC4959428.  
1541
